# Supplementary material for: Unmasking the lipid landscape: carbamazepine induces alterations in Leydig cell lipidome
Source: Royal Society of Chemistry journal article supplement (doi:10.1039/d4mo00221k), 2025-02-04
Supplement: d4mo00221k2.xlsx [file d4mo00221k2.xlsx]

## Sheet: Area Sum Normalization
			Unmasking the Lipid Landscape: Carbamazepine's Induces Alterations in Leydig Cells Lipidome
			Inês Nobre a,b,c, Inês M. S. Guerra a,b, Marisa Pinho a, Ana D. Martins b,d, Laura Goracci e, Stefano Bonciarelli e, Tânia Melo a,b, Pedro Domingues b, Artur Paiva f,g,h, Pedro F. Oliveira b,d, and M. Rosário Domingues *a,b
			a. CESAM-Centre for Environmental and Marine Studies, Department of Chemistry, University of Aveiro, Santiago University Campus, 3810-193 Aveiro, Portugal. b. Mass Spectrometry Centre, LAQV-REQUIMTE, Department of Chemistry, University of Aveiro, Santiago University Campus, 3810-193 Aveiro, Portugal. c. Serviço Patologia Clínica, ULS Coimbra, 3004-561 Coimbra, Portugal. d. LAQV-REQUIMTE and Depar…
			*Corresponding author: Maria Rosário Domingues: mrd@ua.pt
			Table 1: Lipid species and corresponding area normalized by the sum
Sample	25uM_1	25uM_2	25uM_3	25uM_4	25uM_5	25uM_6	200uM_1	200uM_2	200uM_3	200uM_4	200uM_5	200uM_6	CTR_1	CTR_2	CTR_3	CTR_4	CTR_5	CTR_6
Label	25uM	25uM	25uM	25uM	25uM	25uM	200uM	200uM	200uM	200uM	200uM	200uM	CTR	CTR	CTR	CTR	CTR	CTR
Cer 34:O;O2	5.82002e-05	0.000133197	9.03005e-05	5.3932e-05	7.61166e-05	2.61713e-05	6.07476e-05	9.59255e-05	6.14819e-05	3.73764e-05	6.71971e-05	2.66612e-05	6.05323e-05	0.000143586	0.000129344	7.90538e-05	2.8069e-05	6.77483e-05
Cer 34:1;O2	0.000395028	0.000445385	0.000358937	0.000394682	0.000292443	0.000379991	0.000373047	0.000326633	0.000324526	0.000190762	0.000348319	0.000308352	0.000427716	0.000432002	0.000363465	0.000410954	0.000435974	0.000284394
Cer 34:2;O2	2.07459e-05	0	1.73598e-05	1.99557e-05	0	1.45291e-05	2.03008e-05	0	1.17518e-05	0	1.82365e-05	1.06932e-05	2.57273e-05	1.03558e-05	1.08528e-05	2.33212e-05	2.14502e-05	8.90277e-06
Cer 40:1;O2	4.65079e-05	3.8799e-05	4.12792e-05	5.65912e-05	2.86228e-05	4.74214e-05	4.57288e-05	3.92694e-05	3.61191e-05	2.61801e-05	4.31606e-05	4.45516e-05	4.24372e-05	3.98872e-05	3.80879e-05	4.52175e-05	5.46527e-05	2.99952e-05
Cer 40:2;O2	3.01235e-05	7.00565e-05	3.22701e-05	2.61039e-05	4.45047e-05	2.81227e-05	2.13883e-05	3.39639e-05	2.49862e-05	1.78864e-05	2.36403e-05	2.03641e-05	2.11605e-05	5.66726e-05	3.76069e-05	2.88415e-05	2.99698e-05	3.14629e-05
Cer 41:1;O2	4.09434e-05	2.15368e-05	2.84517e-05	5.02068e-05	2.21672e-05	4.11495e-05	4.56873e-05	2.32027e-05	2.88629e-05	1.99574e-05	3.2305e-05	3.84845e-05	4.02796e-05	2.41464e-05	2.25318e-05	3.3493e-05	4.37278e-05	2.45304e-05
Cer 41:2;O2	2.70915e-05	1.28468e-05	1.53824e-05	2.59721e-05	1.2772e-05	2.7947e-05	2.69641e-05	1.98504e-05	1.81872e-05	1.12787e-05	1.85081e-05	2.42792e-05	2.87312e-05	1.97302e-05	1.40633e-05	2.44848e-05	3.03055e-05	1.33543e-05
Cer 42:1;O2	0.000530375	0.000325807	0.000392146	0.000465139	0.000371712	0.00054801	0.000629714	0.000433795	0.000397458	0.000385524	0.000390083	0.000567748	0.000553178	0.000354426	0.000323294	0.000381376	0.000560626	0.000370027
Cer 42:2;O2	0.00071544	0.000703003	0.000581985	0.000847646	0.000533241	0.000783207	0.000764885	0.00075227	0.000598921	0.000507241	0.000702874	0.000734215	0.000720866	0.000749161	0.000583054	0.000741089	0.000831325	0.000558013
Cer 43:1;O2	1.72767e-05	0	9.9134e-06	1.12195e-05	9.0775e-06	1.55944e-05	2.39582e-05	0	1.06671e-05	0	1.02887e-05	1.9041e-05	1.50195e-05	0	0	0	1.43608e-05	8.47966e-06
Cer 43:2;O2	1.5762e-05	0	0	0	0	1.32239e-05	1.8677e-05	0	0	0	0	1.393e-05	1.34884e-05	0	0	0	1.26769e-05	0
Cer 44:2;O2	4.99285e-05	3.41134e-05	3.81009e-05	2.06833e-05	4.22036e-05	4.93857e-05	6.48362e-05	4.66125e-05	3.9531e-05	4.26584e-05	2.41302e-05	5.86521e-05	5.29081e-05	3.75698e-05	2.77041e-05	2.21238e-05	4.69311e-05	3.69693e-05
Coenzyme Q10	5.24557e-05	2.94475e-05	4.50162e-05	5.02136e-05	3.31261e-05	4.6006e-05	5.79193e-05	1.90586e-05	2.89187e-05	2.44377e-05	4.63194e-05	5.47694e-05	5.25348e-05	3.04513e-05	4.56098e-05	3.87888e-05	5.3226e-05	2.8247e-05
DG 34:1	5.08632e-05	3.5155e-05	3.67752e-05	2.3397e-05	2.94291e-05	1.76399e-05	4.23946e-05	3.27363e-05	2.59364e-05	1.97999e-05	2.84321e-05	2.05733e-05	4.80884e-05	5.14301e-05	4.0449e-05	3.16853e-05	1.91766e-05	3.01294e-05
DG 36:2	0.000104695	7.92015e-05	4.3806e-05	2.65741e-05	5.69079e-05	2.39514e-05	9.41347e-05	5.91653e-05	3.56164e-05	5.33794e-05	4.36279e-05	2.42018e-05	9.99304e-05	0.000119311	5.51623e-05	4.07355e-05	2.46017e-05	5.54698e-05
DG 36:4	5.05939e-05	1.77189e-05	2.28329e-05	1.32831e-05	1.11671e-05	2.31489e-05	6.40212e-05	1.55268e-05	1.67931e-05	1.01777e-05	1.08855e-05	2.73704e-05	4.58001e-05	1.77324e-05	2.11453e-05	1.1334e-05	2.54204e-05	1.62868e-05
DG 38:4	0.00016302	5.89327e-05	5.37366e-05	5.47214e-05	5.44083e-05	8.07512e-05	0.000148606	4.84094e-05	4.22424e-05	5.11161e-05	4.07027e-05	7.75658e-05	0.000157137	6.04482e-05	5.97381e-05	6.91824e-05	6.893e-05	5.73993e-05
DG 38:5	0.000136842	6.19701e-05	4.54029e-05	3.09474e-05	3.65251e-05	4.36824e-05	0.000160244	4.06061e-05	3.7509e-05	2.55233e-05	3.54868e-05	4.87232e-05	0.000133362	4.66723e-05	4.88619e-05	3.32552e-05	4.91032e-05	4.46085e-05
DG 38:6	5.20278e-05	2.25412e-05	3.06791e-05	1.84274e-05	1.72752e-05	2.78862e-05	7.33565e-05	1.89419e-05	2.41584e-05	1.18893e-05	1.96303e-05	3.26002e-05	5.9691e-05	2.18968e-05	2.37263e-05	2.09842e-05	3.04339e-05	2.00553e-05
DG 40:5	7.89825e-05	2.72124e-05	1.98588e-05	1.20038e-05	1.92253e-05	2.31209e-05	6.41373e-05	2.13494e-05	1.76692e-05	1.14436e-05	1.11244e-05	2.44579e-05	6.86672e-05	2.53702e-05	1.76005e-05	1.2575e-05	2.43347e-05	2.03679e-05
DG 40:6	3.26638e-05	1.00449e-05	9.52802e-06	0	8.17896e-06	0	3.23377e-05	0	0	0	0	1.05304e-05	3.40302e-05	8.79663e-06	9.85719e-06	0	0	8.40154e-06
HexCer 34:1;O2	0.000135397	0.000195554	0.000238726	0.000258801	0.000161148	0.000190627	0.000139164	0.000180477	0.000265288	0.000144026	0.000224224	0.000170728	0.000145559	0.000211835	0.000193134	0.000231155	0.000182143	0.000129599
HexCer 40:1;O2	1.28051e-05	1.49783e-05	1.67668e-05	2.28619e-05	1.19152e-05	1.36737e-05	1.88703e-05	1.5707e-05	1.74619e-05	1.25631e-05	2.02912e-05	1.96832e-05	0	1.33364e-05	1.62046e-05	1.23239e-05	1.30849e-05	9.48359e-06
HexCer 42:1;O2	0.000104769	8.73736e-05	9.70604e-05	0.000112192	0.00011883	0.00013265	0.00016675	0.000110857	0.000136436	0.000134757	0.000107382	0.000180053	8.94902e-05	8.86251e-05	7.98522e-05	7.38615e-05	0.000122469	8.56912e-05
HexCer 42:2;O2	9.20102e-05	0.000129363	0.000103593	0.000119568	0.000116813	0.000133034	0.000129993	0.000135906	0.000136456	0.000120722	0.00012438	0.000147975	7.87079e-05	0.000132139	9.66272e-05	9.43176e-05	0.000130485	8.79586e-05
LPC 16:0	0.000673424	0.000674127	0.000779571	0.000780716	0.000794	0.000634086	0.00055888	0.000698798	0.000744256	0.000581328	0.000652047	0.000702023	0.000770488	0.000862897	0.000880065	0.000763197	0.00102015	0.000805089
LPC 16:1	7.05963e-05	3.86068e-05	5.85283e-05	3.42419e-05	6.27072e-05	3.34818e-05	6.47545e-05	4.89992e-05	5.17963e-05	4.03949e-05	4.35296e-05	4.14765e-05	8.26129e-05	5.78261e-05	4.19441e-05	3.70294e-05	5.19558e-05	6.49461e-05
LPC 18:0	0.00025157	0.000351891	0.000381742	0.000384345	0.000383264	0.000265314	0.000211017	0.000327298	0.000360811	0.000273594	0.000333041	0.000325744	0.000245183	0.00040069	0.000396046	0.000330171	0.000403322	0.000354768
LPC 18:1	0.00029349	0.000336907	0.000344601	0.000366127	0.000358544	0.000246102	0.000259116	0.000281253	0.000312352	0.000278053	0.000337324	0.000265968	0.000361208	0.000386337	0.000342622	0.000390472	0.000472982	0.000397578
PC 28:0	0.00609611	0.0055299	0.00485288	0.00471602	0.00476348	0.00578227	0.00604241	0.00605532	0.00540245	0.00596633	0.00397575	0.00516732	0.00657137	0.00523097	0.00446873	0.00464255	0.0053155	0.00488726
PC 28:1	6.22937e-05	0	7.54122e-06	0	1.16376e-05	0	8.1065e-05	3.71091e-05	1.47663e-05	4.35313e-05	0	2.70555e-05	4.6939e-05	0	0	0	0	1.1651e-05
PC 30:0	0.018084	0.0144639	0.0156242	0.00935145	0.012905	0.0118242	0.0189922	0.0181425	0.0168808	0.0159914	0.0117257	0.0139797	0.0173795	0.0158496	0.0157678	0.00968404	0.0103927	0.014085
PC 30:1	0.00971909	0.0052463	0.00475666	0.00194239	0.00578397	0.00483054	0.0107627	0.00750261	0.00590439	0.00756858	0.00292541	0.005602	0.0080688	0.00524839	0.00424476	0.00201412	0.00396023	0.00544274
PC 31:0_A	0.00064707	0.000304801	0.000397237	0.000316788	0.000372908	0.000532557	0.000753788	0.0004448	0.000442866	0.000410545	0.000307666	0.000539592	0.000669501	0.00037334	0.000399568	0.000244767	0.000475388	0.00040401
PC 31:0_B	0.00170325	0.00101365	0.00163142	0.00159888	0.00110101	0.00132017	0.00187801	0.00136316	0.00161403	0.00121652	0.00166465	0.0016077	0.00154391	0.00114676	0.00148992	0.0014136	0.00133317	0.00117091
PC 31:1	0.00257518	0.00109276	0.00146229	0.00114371	0.00147307	0.00171418	0.00281993	0.00162925	0.00154689	0.00154806	0.00119106	0.00178512	0.00233581	0.00125918	0.00122498	0.000952139	0.00164903	0.00146148
PC 32:0	0.0161618	0.0188697	0.0197839	0.0186643	0.0160128	0.0164498	0.0161669	0.0201379	0.0205024	0.019885	0.0208816	0.0199402	0.0156731	0.019625	0.0197523	0.0187652	0.0147556	0.0173634
PC 32:1	0.160653	0.134388	0.129531	0.0984711	0.13933	0.135426	0.158294	0.159334	0.135054	0.148593	0.106875	0.128849	0.160301	0.138475	0.122407	0.0996136	0.133531	0.1355
PC 32:2_A	0.0123067	0.00844796	0.00812205	0.00411768	0.0102471	0.00817881	0.0136852	0.0108795	0.00939617	0.012669	0.00606419	0.00948088	0.00992469	0.00852376	0.00707384	0.0045245	0.00645031	0.00883222
PC 32:2_B	0.000815829	0.000563432	0.000626486	0.000583033	0.000457769	0.000653351	0.000916118	0.000555483	0.000642032	0.000636443	0.000525081	0.000721313	0.000790727	0.000573305	0.000548049	0.000414588	0.000676218	0.000514415
PC 33:0	0.000986475	0.000673346	0.000765697	0.000793633	0.00058512	0.000689959	0.00100553	0.000760102	0.000783762	0.000565777	0.000777752	0.000734748	0.00096261	0.000746145	0.000784494	0.00069974	0.000742493	0.000639986
PC 33:1	0.011632	0.00591721	0.00861235	0.00899918	0.00764806	0.00947793	0.0121965	0.00726217	0.00817464	0.00728383	0.00832008	0.00937542	0.0111962	0.00638899	0.00775927	0.00806216	0.0101994	0.00792584
PC 33:2_A	0.000652982	0.000240645	0.000419199	0.000266361	0.000404723	0.0003768	0.000611452	0.000417101	0.000448179	0.000417575	0.000321334	0.000419398	0.000499183	0.000286218	0.000301698	0.000281181	0.000347232	0.00036316
PC 33:2_B	0.00125344	0.000525465	0.000839131	0.000719718	0.000821554	0.00091942	0.00145128	0.000763095	0.000871276	0.00092095	0.000780063	0.00106861	0.00102986	0.000620491	0.000661551	0.000621275	0.000858986	0.000793284
PC 34:0	0.00131226	0.00148581	0.00158352	0.00167867	0.00143881	0.00155193	0.00142375	0.0015093	0.00159202	0.0014558	0.00194509	0.00174304	0.00122266	0.00156272	0.00168528	0.00171416	0.00146275	0.00153011
PC 34:1	0.209226	0.214655	0.213008	0.226397	0.191605	0.212235	0.187025	0.205976	0.205959	0.184446	0.213422	0.195657	0.219997	0.213712	0.217932	0.240972	0.218502	0.197907
PC 34:2_A	0.0333499	0.0385275	0.0296106	0.0222004	0.0418245	0.0305075	0.0350995	0.0437974	0.0337443	0.0444531	0.0279756	0.0315275	0.0344934	0.0350326	0.0292291	0.0253145	0.0288593	0.0388068
PC 34:2_B	0.0648196	0.058918	0.0615027	0.0587763	0.0684689	0.0654641	0.0655711	0.0621521	0.0625412	0.070326	0.0595189	0.0640634	0.0593317	0.0614362	0.0561116	0.0557082	0.0624209	0.065195
PC 34:3_A	0.0010234	0.000642032	0.00076991	0.000604191	0.000900227	0.000870113	0.00133146	0.000878567	0.000923299	0.00110997	0.000748949	0.00104909	0.000854402	0.00068793	0.00055889	0.00061022	0.000795533	0.000795576
PC 34:3_B	0.00194191	0.00167504	0.00152506	0.00116019	0.00207254	0.00162277	0.00229986	0.00190419	0.00172294	0.00215999	0.00141256	0.0018108	0.00167959	0.00162189	0.00131273	0.0011173	0.00142205	0.00181752
PC 34:3_C	0.00170226	0.00128527	0.00129582	0.00099914	0.00169382	0	0.00205418	0.0015451	0.00152878	0.00185842	0.00121916	0	0.00143805	0.00125852	0.00104879	0.000938146	0	0.00159196
PC 34:3_D	0.00256185	0.0018608	0.00209903	0.00142182	0.00191887	0.00175648	0.00267329	0.00170506	0.00201803	0.00167646	0.00135952	0.00184688	0.00200241	0.00188587	0.00166268	0.0010115	0.00178869	0.00177536
PC 34:4	0.000985065	0.000376386	0.000615069	0.000419463	0.000570946	0.00093544	0.00106209	0.000468674	0.000648475	0.00062303	0.000428606	0.00102975	0.000847908	0.000392593	0.00050056	0.000361409	0.000807563	0.000590122
PC 35:0	5.00498e-05	3.32617e-05	4.25889e-05	4.12886e-05	3.69787e-05	2.59505e-05	5.84283e-05	3.40133e-05	3.91593e-05	0	4.98795e-05	3.93294e-05	2.83367e-05	4.92894e-05	4.56984e-05	3.25313e-05	3.21051e-05	3.62668e-05
PC 35:1_A	0.00090248	0.000596933	0.000736535	0.000768662	0.000716316	0.000707388	0.000838174	0.000624833	0.000588412	0.000614757	0.000767954	0.00067341	0.000980643	0.000692125	0.000807096	0.000747625	0.000771839	0.000651078
PC 35:1_B	0.00534941	0.00307965	0.00446174	0.00575422	0.0037883	0.00479235	0.00544086	0.0032977	0.00442978	0.0033888	0.00534354	0.00507164	0.00490858	0.00330202	0.00439139	0.00541943	0.00504904	0.00428358
PC 35:2_A	0.00352043	0.00205805	0.00282432	0.00329881	0.00295588	0.00315088	0.00401533	0.00245051	0.0031039	0.00317279	0.00336092	0.00338547	0.00328947	0.00216219	0.0025365	0.00301491	0.00336716	0.00313036
PC 35:2_B	0.00144427	0.00180165	0.00157409	0.00141231	0.00171658	0.00134735	0.0014213	0.00184033	0.00144935	0.00149942	0.00141163	0.00127824	0.00133801	0.00197969	0.00174168	0.00130687	0.00119686	0.00169698
PC 35:3	0.000582737	0.000443558	0.000613681	0.000597732	0.000508562	0.000563311	0.000601394	0.000502352	0.00059654	0.000502097	0.000510519	0.000561155	0.000529162	0.000512255	0.000522737	0.000452621	0.000567808	0.000492254
PC 35:4	0.000208092	5.25042e-05	0.000164565	0.00024514	0.000112133	0.000276691	0.000244694	6.7906e-05	0.00013809	8.58085e-05	0.000162294	0.00028478	0.000189863	7.0364e-05	0.00013113	0.000165385	0.000277875	0.000114786
PC 36:1	0.0504288	0.0639077	0.0619788	0.0665677	0.0591101	0.0524163	0.0496069	0.0558347	0.0591703	0.0478323	0.0708192	0.05064	0.0478989	0.0659869	0.0680237	0.0677526	0.0534765	0.0581637
PC 36:2	0.0851599	0.123974	0.101303	0.100834	0.118688	0.0878205	0.0808958	0.10907	0.10332	0.110954	0.110026	0.0832668	0.0846564	0.116571	0.108463	0.107391	0.0863304	0.117918
PC 36:3_A	0.00938057	0.00868599	0.0108372	0.0101659	0.0127558	0.0101828	0.0103398	0.0105866	0.0112036	0.0137207	0.0112831	0.0114268	0.00873644	0.00922778	0.00959647	0.00958726	0.00957972	0.011985
PC 36:3_B	0.0114043	0.0148866	0.0111098	0.0122339	0.01414	0.0109497	0.0126296	0.0121376	0.0118704	0.0112291	0.0123355	0.0103629	0.00982871	0.0136526	0.0116106	0.0103455	0.0116484	0.0129436
PC 36:3_C	0.00829989	0.00980982	0.0101005	0.0104123	0.00832954	0.00866438	0.00840544	0.00875037	0.00974478	0.00781915	0.00925407	0.00864788	0.00750663	0.00964255	0.00976307	0.0088296	0.00900717	0.00822542
PC 36:4	0.0277024	0.0194973	0.0337575	0.0508792	0.0230786	0.0473595	0.0291258	0.0213648	0.0304887	0.0228233	0.0347466	0.0470039	0.0301796	0.0217997	0.0296028	0.0383009	0.0493919	0.0260802
PC 36:5_A	0.00195507	0.000861148	0.00145934	0.00132255	0.00116587	0.00201309	0.00216579	0.000975213	0.00140976	0.00132463	0.00131044	0.00237752	0.00166858	0.000958634	0.00123269	0.00113724	0.00161752	0.00124166
PC 36:5_B	0.00114956	0.000539916	0.000903379	0.000910019	0.0008157	0.00113857	0.00152175	0.000810767	0.00108001	0.000849401	0.000768942	0.00131194	0.000974028	0.000589588	0.000677296	0.000534901	0.00114206	0.000748007
PC 36:6_A	4.15318e-05	0	2.41315e-05	0	2.20638e-05	2.81701e-05	6.70372e-05	2.05615e-05	3.5947e-05	2.56304e-05	8.14028e-06	4.47123e-05	2.36115e-05	0	0	0	1.41927e-05	9.0403e-06
PC 36:6_B	0.000349756	8.25606e-05	0.000191477	0.000130501	0.000140833	0.000314615	0.000367715	0.000122538	0.000193886	0.000167098	0.000126277	0.000350227	0.000341369	9.26815e-05	0.000147124	0.000114777	0.000263576	0.000166135
PC 36:7	8.3834e-05	9.62946e-06	4.54492e-05	2.01748e-05	3.85029e-05	6.50066e-05	9.04994e-05	2.26545e-05	4.1484e-05	4.12369e-05	2.47601e-05	7.14734e-05	6.02249e-05	2.23682e-05	3.38067e-05	1.04351e-05	5.25517e-05	3.95011e-05
PC 37:1	0.000753365	0.00058948	0.000747685	0.000935204	0.000663966	0.000717651	0.000734127	0.000589901	0.000693452	0.000573478	0.000916603	0.000711267	0.000729271	0.000647673	0.000767484	0.000915414	0.000722303	0.000680507
PC 37:2_A	0.00267969	0.00240678	0.00269776	0.00323442	0.00276367	0.00248835	0.00272688	0.00226593	0.00270028	0.00230961	0.00341838	0.00253468	0.00235711	0.0025589	0.00297102	0.00309863	0.0026361	0.00297469
PC 37:2_B	0.00114489	0.00131771	0.0012251	0.00134858	0.00119298	0.00101111	0.00120054	0.000974983	0.00122893	0.000987472	0.00140715	0.00101986	0.00105786	0.0013294	0.00130822	0.00133708	0.00101461	0.00124111
PC 37:2_C	0.000599774	0.000596988	0.000688404	0.000721138	0.000519551	0.000528447	0.000640281	0.000526676	0.000688706	0.000534191	0.000775919	0.000514216	0.000545872	0.000643818	0.000753247	0.000655705	0.000516682	0.000706167
PC 37:5	0.000207295	6.61924e-05	0.000162902	0.000218529	0.000111013	0.000231216	0.000244678	8.36116e-05	0.00014325	9.93556e-05	0.000165832	0.00026937	0.000196848	7.83577e-05	0.000134438	0.000159689	0.000232921	0.000118057
PC 37:6	6.54864e-05	0	4.06084e-05	5.70592e-05	2.05857e-05	7.84831e-05	6.95012e-05	1.02499e-05	3.84268e-05	1.86244e-05	3.79678e-05	7.83863e-05	6.59609e-05	1.37432e-05	3.14014e-05	4.02157e-05	8.66025e-05	2.48996e-05
PC 38:1	0.000864368	0.00123232	0.000950686	0.000949116	0.00120244	0.00080066	0.000837151	0.00116106	0.000983345	0.00113003	0.00112272	0.000856268	0.000765059	0.00126805	0.00111475	0.000987188	0.000775011	0.0011237
PC 38:2_A	0.0042637	0.00789215	0.00577609	0.0061919	0.00875668	0.0047073	0.00421609	0.00713196	0.00539299	0.00747575	0.0073387	0.00438874	0.004066	0.00799404	0.00642098	0.00627204	0.00483778	0.00798244
PC 38:2_B	0.00398576	0.00930857	0.00593267	0.00541407	0.00644729	0.00317333	0.00373734	0.00637884	0.00604791	0.00448619	0.00633166	0.00306343	0.00320721	0.00861053	0.00749647	0.0060942	0.00311645	0.00604002
PC 38:3_A	0.00371548	0.00924043	0.00559402	0.00537724	0.00735962	0.00357733	0.00373791	0.00683516	0.00589828	0.00603404	0.00626406	0.00339881	0.00337443	0.00823162	0.00685608	0.00542007	0.00337955	0.00700176
PC 38:3_B	0.00343054	0.00423836	0.00418203	0.00507981	0.00361432	0.00376785	0.00347202	0.00323678	0.00409151	0.00331986	0.00449656	0.00394486	0.00322391	0.0036932	0.00426143	0.00433284	0.00399966	0.0036734
PC 38:4_A	0.00899569	0.00632161	0.00891646	0.00969619	0.00733754	0.0127808	0.00919681	0.00595472	0.00802585	0.00655846	0.0094589	0.0134357	0.0082745	0.00699884	0.0093616	0.0105047	0.0132489	0.0082137
PC 38:4_B	0.00778509	0.00774943	0.0108302	0.0175918	0.00795977	0.0144101	0.00825608	0.00704416	0.010707	0.00791932	0.0126147	0.0154149	0.008479	0.00765639	0.0099043	0.0123022	0.0149683	0.0081329
PC 38:5_A	0.0194083	0.014205	0.022614	0.0283252	0.0158329	0.0274867	0.0200682	0.0147869	0.02106	0.0162195	0.0222395	0.0281832	0.0211939	0.0155357	0.0207211	0.0235424	0.0282579	0.0179607
PC 38:5_B	0.00337909	0.00137843	0.00309208	0.00361092	0.00213291	0.00475603	0.00362543	0.00143544	0.00308526	0.0018023	0.00358342	0.00489326	0.00307037	0.00136003	0.00298745	0.00320562	0.00507849	0.00230443
PC 38:6_A	0.000687016	0.000276505	0.000432582	0.000311633	0.000326202	0.000534188	0.00067727	0.00030032	0.000445849	0.000394373	0.000358666	0.00065128	0.000570428	0.000298187	0.000407592	0.000359449	0.000498549	0.000331362
PC 38:6_B	0.010962	0.00491258	0.0108813	0.0130281	0.00668986	0.0150951	0.0119895	0.00544895	0.00911541	0.0059414	0.0103695	0.0171902	0.0111276	0.00595668	0.00984204	0.0112373	0.0159389	0.00777423
PC 38:7	0.000757583	0.00028087	0.000560417	0.000492676	0.000398258	0.000763723	0.000840284	0.00031651	0.000533019	0.0004588	0.00046526	0.000969129	0.00073678	0.000334622	0.000469115	0.000438423	0.000641671	0.000441685
PC 39:2	0.000236995	0.000230916	0.000235197	0.000231958	0.0002302	0.000191579	0.000220843	0.00020979	0.000212778	0.000201132	0.000246153	0.000183659	0.000228605	0.000246047	0.000266727	0.000238183	0.00019437	0.000226483
PC 39:3	0.000234572	0.000287135	0.000267925	0.000246948	0.000275253	0.000185105	0.000234052	0.00024861	0.000260712	0.000218404	0.000284719	0.000167327	0.00019979	0.000319021	0.000305118	0.00025024	0.000181471	0.00029144
PC 39:4_A	0.000218607	0.000214745	0.000241621	0.000258738	0.000216614	0.000228128	0.000216219	0.000198717	0.000249136	0.000209012	0.000250537	0.000249053	0.000226066	0.00019694	0.000228525	0.00022774	0.000229631	0.000221199
PC 39:4_B	0.00024057	0.000185131	0.000232706	0.000317969	0.000193142	0.000304569	0.000245184	0.000169198	0.000235247	0.0001842	0.000271003	0.000312945	0.000241443	0.000200137	0.00023604	0.000281044	0.000330648	0.000207463
PC 39:5	0.000436635	0.000195435	0.000400461	0.000586969	0.000279444	0.000560266	0.000518596	0.000214448	0.000382184	0.000263379	0.000467786	0.000637393	0.000402656	0.000218399	0.000363013	0.000414199	0.000588873	0.000307891
PC 40:1	0.000290525	0.000166618	0.000206043	0.000147054	0.00025318	0.000196769	0.00035459	0.00021935	0.000227106	0.000301154	0.000166143	0.000252992	0.000265298	0.000179296	0.00018251	0.000126839	0.000179051	0.000229208
PC 40:2	0.00132307	0.00192578	0.00134504	0.00103724	0.00171243	0.00111218	0.00120832	0.00167122	0.0012644	0.00160342	0.00119108	0.0010529	0.00117539	0.00187682	0.00156427	0.00117958	0.00106387	0.00161026
PC 40:3_A	0.001042	0.00245013	0.00153654	0.00123902	0.00176303	0.000894786	0.000945223	0.00166581	0.00137802	0.00127203	0.00151786	0.000895743	0.000890945	0.00220444	0.0018872	0.0014342	0.000897989	0.0016528
PC 40:3_B	0.000367901	0.00054081	0.000486571	0.000523694	0.000384644	0.000450645	0.000346315	0.000407369	0.000424294	0.000312081	0.000453158	0.000426759	0.000361719	0.000533114	0.000599603	0.000521431	0.00043894	0.000406485
PC 40:4_A	0.000660916	0.000910461	0.000769713	0.00084553	0.000799446	0.000769913	0.000655196	0.000642633	0.00077974	0.000659662	0.000850796	0.000810219	0.000571109	0.000842642	0.000944211	0.000884494	0.000817843	0.000807076
PC 40:4_B	0.0023846	0.00213223	0.00254007	0.00316709	0.00219803	0.00328433	0.00258347	0.00172861	0.00244709	0.00182872	0.00307245	0.00366727	0.002185	0.00206459	0.00285419	0.00302049	0.00348238	0.00235244
PC 40:5_A	0.00453488	0.00365239	0.00508399	0.00639325	0.00369698	0.00649216	0.00460837	0.00338969	0.00495051	0.00367021	0.00522841	0.00666508	0.00488525	0.0036095	0.00490966	0.00504699	0.00669947	0.00392816
PC 40:5_B	0.000513118	0.00028208	0.00062293	0.000853079	0.000379756	0.000815012	0.00058755	0.000239628	0.000596733	0.000341848	0.000771029	0.000915705	0.000464312	0.000316119	0.000617707	0.000691734	0.000853315	0.000420114
PC 40:6_A	0.00486108	0.00361196	0.0053303	0.00555849	0.0040678	0.00581887	0.00507911	0.00359205	0.00527641	0.00411645	0.0052898	0.00625808	0.00496668	0.00375592	0.00520416	0.00505873	0.00576552	0.00440968
PC 40:6_B	0.00385805	0.00229038	0.00456399	0.00621392	0.002845	0.00582052	0.00433444	0.00228717	0.00417488	0.00268009	0.00494292	0.00685963	0.00364306	0.00261015	0.0041102	0.00457184	0.0059476	0.00315093
PC 40:7_A	0.00352723	0.00250176	0.00399655	0.00457855	0.00305718	0.00444964	0.00391067	0.00228689	0.00357052	0.00275323	0.00420358	0.00532395	0.00367171	0.00291737	0.0040041	0.00423678	0.00437935	0.00355645
PC 40:7_B	0.000485062	0.000468954	0.000690932	0.00118087	0.000437618	0.00105231	0.000463658	0.000465327	0.000695534	0.000541699	0.000759349	0.00106252	0.000551188	0.000433602	0.000558467	0.000798772	0.00104558	0.000483406
PC 40:8	0.000137743	6.10386e-05	7.97932e-05	9.03243e-05	6.00376e-05	9.55158e-05	0.000141583	4.34296e-05	6.03802e-05	5.08916e-05	7.93122e-05	9.94722e-05	0.000130126	9.21839e-05	9.69457e-05	8.40077e-05	8.47361e-05	8.60077e-05
PC 41:2	5.41965e-05	0	2.62745e-05	0	3.96298e-05	1.56765e-05	5.53185e-05	1.48386e-05	1.88205e-05	3.30047e-05	2.37632e-05	3.85168e-05	4.56801e-05	2.59955e-05	2.95192e-05	8.97247e-06	1.93495e-05	3.72097e-05
PC 41:6	4.53903e-05	0	4.8086e-05	6.78881e-05	1.90628e-05	5.70568e-05	7.63099e-05	8.95361e-06	4.02896e-05	1.53478e-05	5.88954e-05	7.76731e-05	4.03823e-05	1.38683e-05	3.75339e-05	3.93445e-05	6.46048e-05	3.1889e-05
PC 41:7	7.67035e-05	1.94868e-05	7.7992e-05	0.000118843	4.50473e-05	0.000124441	8.53789e-05	2.4482e-05	7.03702e-05	4.38351e-05	9.98675e-05	0.000141386	7.90697e-05	2.91822e-05	6.68544e-05	8.20135e-05	0.000113615	5.30308e-05
PC 42:1	0.000191	7.64669e-05	0.000135104	0.000115411	0.000136151	0.000132545	0.000249251	0.000113231	0.000149163	0.00016609	0.000118591	0.000170963	0.000200604	8.62205e-05	0.000108233	9.1958e-05	0.0001167	0.000127289
PC 42:10	5.54283e-05	1.28108e-05	3.09607e-05	4.42238e-05	1.24831e-05	4.14957e-05	5.7774e-05	9.18493e-06	1.69162e-05	1.03192e-05	2.65583e-05	4.13178e-05	6.85482e-05	2.49832e-05	3.09759e-05	3.90697e-05	4.21884e-05	1.94662e-05
PC 42:2	0.000534818	0.000489469	0.000437398	0.000294717	0.000592882	0.000394614	0.000582581	0.000543219	0.000462328	0.000662897	0.000359762	0.000469927	0.000510249	0.000496183	0.000436884	0.000289911	0.000361907	0.000549984
PC 42:3	0.000314739	0.000531719	0.000368397	0.000254499	0.000441977	0.000289194	0.000305666	0.000429761	0.00033651	0.000407098	0.000302682	0.000286098	0.000280162	0.000499183	0.000424295	0.000273735	0.000264979	0.000431846
PC 42:4_A	7.63338e-05	8.63037e-05	7.82581e-05	4.96833e-05	6.54661e-05	4.91527e-05	7.23708e-05	5.19765e-05	5.64645e-05	6.34174e-05	6.36483e-05	6.71482e-05	9.75644e-05	7.2576e-05	9.49713e-05	5.36021e-05	5.90489e-05	7.85026e-05
PC 42:4_B	7.99623e-05	9.25682e-05	8.01847e-05	8.08526e-05	9.26395e-05	0.000115045	7.15802e-05	6.89847e-05	6.04635e-05	4.82177e-05	8.20484e-05	0.000117317	9.12875e-05	8.49195e-05	7.82213e-05	7.52324e-05	0.00012009	8.13303e-05
PC 42:5_A	0.000163362	0.000129859	0.000152898	0.000176136	0.000162029	0.000207124	0.000179384	9.89108e-05	0.000139904	0.000133554	0.00020168	0.00023359	0.00012686	0.000133593	0.00017945	0.000155873	0.000216334	0.000180039
PC 42:5_B	0.000207413	0.000120769	0.000175884	0.000175724	0.000172602	0.000250673	0.000220719	0.000104577	0.000161693	0.000115955	0.000184256	0.000256987	0.000200252	0.00015389	0.000197158	0.000154858	0.000256273	0.000191577
PC 42:6	0.000376233	0.000361844	0.000419323	0.000491205	0.000394552	0.000521211	0.000383479	0.00032146	0.00042846	0.00040561	0.000462551	0.000515921	0.000410479	0.000349376	0.000412016	0.000424143	0.000507868	0.00041587
PC 42:7_A	0.000233968	0.00016183	0.000211354	0.000218275	0.000195774	0.000230997	0.000241427	0.000148342	0.000202743	0.000181391	0.000219069	0.00024409	0.000224805	0.000174865	0.000219861	0.000207987	0.000223157	0.000204769
PC 42:7_B	0.000217155	0.000181877	0.000277075	0.000376871	0.000254933	0.000324977	0.000248451	0.000162621	0.000264184	0.000238429	0.000355935	0.000375273	0.000189032	0.000209	0.00026929	0.000289375	0.000321552	0.000262851
PC 42:8	6.60704e-05	4.57519e-05	7.42085e-05	0.000111334	4.47299e-05	8.28479e-05	7.15113e-05	3.02147e-05	5.97682e-05	3.51039e-05	9.02556e-05	9.5426e-05	7.22891e-05	6.33992e-05	7.85094e-05	9.03909e-05	8.32143e-05	6.30333e-05
PC 44:2	7.3394e-05	0	3.55824e-05	0	6.44658e-05	3.96077e-05	0.000104118	3.96096e-05	4.71246e-05	9.51145e-05	1.19145e-05	7.69875e-05	5.69604e-05	8.30503e-06	2.01132e-05	0	1.44605e-05	3.68447e-05
PC 44:3	5.24032e-05	5.64162e-05	5.87138e-05	2.24419e-05	7.15138e-05	3.39024e-05	6.88166e-05	6.20572e-05	5.85831e-05	8.62596e-05	3.9723e-05	6.39743e-05	4.4235e-05	5.02922e-05	5.5023e-05	8.75305e-06	2.71119e-05	6.1802e-05
PC 44:5	4.94509e-05	1.98709e-05	4.02792e-05	2.0779e-05	5.18786e-05	5.08997e-05	6.4149e-05	2.18452e-05	3.80379e-05	5.28172e-05	2.9974e-05	7.44795e-05	3.8404e-05	2.54335e-05	3.76887e-05	0	3.73904e-05	5.44144e-05
PC 44:6	3.84804e-05	3.14469e-05	5.84024e-05	4.75569e-05	4.57447e-05	4.95347e-05	5.00322e-05	2.62646e-05	4.03303e-05	2.63526e-05	4.79805e-05	5.99201e-05	2.79461e-05	3.65916e-05	5.29288e-05	3.11122e-05	4.90534e-05	4.70375e-05
PC O-30:0	0.00100641	0.000693185	0.000872722	0.000332249	0.00088341	0.000500093	0.00113465	0.000751184	0.000907032	0.000879917	0.000417511	0.000688312	0.000774785	0.000880397	0.000766978	0.000374445	0.000434683	0.000778735
PC O-30:1_A	7.66055e-05	3.77726e-05	7.48148e-05	0	7.45587e-05	2.10685e-05	8.95975e-05	4.53845e-05	6.52747e-05	6.15038e-05	0	5.1466e-05	5.55287e-05	6.54014e-05	5.91201e-05	0	1.34233e-05	5.42312e-05
PC O-30:1_B	4.14299e-05	1.29262e-05	5.49454e-05	2.74543e-05	2.2651e-05	1.86546e-05	6.55992e-05	2.23302e-05	5.73014e-05	2.25395e-05	2.89046e-05	3.87246e-05	3.65854e-05	2.12542e-05	4.97671e-05	2.20819e-05	2.80325e-05	1.85529e-05
PC O-31:0	0.000116273	4.05809e-05	9.47391e-05	6.3138e-05	8.94035e-05	7.05232e-05	0.000160282	8.62678e-05	0.000113539	0.000104132	7.66227e-05	0.000110989	0.00010593	7.07671e-05	6.82542e-05	5.79329e-05	5.53558e-05	7.57207e-05
PC O-32:0	0.00248477	0.00197172	0.00249868	0.00137846	0.00251165	0.00136396	0.00303523	0.00214864	0.00279991	0.00273698	0.0019738	0.00215852	0.00191347	0.00234264	0.00211218	0.00153095	0.00114545	0.00211997
PC O-32:1_A	0.00199714	0.00180962	0.0024484	0.00127008	0.00226435	0.00124073	0.00215974	0.00189157	0.00243461	0.00222451	0.0014188	0.00163127	0.00168672	0.00234919	0.00208779	0.0014268	0.00110032	0.00196921
PC O-32:1_B	0.000136905	8.74753e-05	0.000214941	0.000178904	0.000113761	9.74987e-05	0.000230418	0.000127794	0.000278465	0.000116701	0.000199308	0.000179937	0.000101573	0.00012037	0.00020943	0.00013657	8.55684e-05	9.02139e-05
PC O-33:1_A	0.000153976	7.97251e-05	0.000186345	0.000180812	0.000123289	0.00010858	0.000186171	0.000104503	0.00019325	0.00011877	0.000158884	0.00014486	0.000133083	0.000124504	0.000145016	0.000161598	9.61847e-05	0.000116605
PC O-33:1_B	0.00018191	0.000166127	0.000118971	0.000167638	0.000174906	9.85325e-05	0.000238115	0.00019665	0.000182455	0.000209521	0.000233957	0.000174989	0.000157409	0.000162372	0.000126735	0.000182766	7.51289e-05	0.000140659
PC O-33:2	7.18242e-05	0.00010106	4.75155e-05	5.80144e-05	7.77018e-05	2.44922e-05	9.62296e-05	8.88011e-05	7.97976e-05	7.7855e-05	8.52138e-05	4.44061e-05	5.62183e-05	8.25869e-05	5.83459e-05	7.30203e-05	1.3228e-05	6.59502e-05
PC O-34:0	6.52032e-05	4.83557e-05	9.4774e-05	7.80141e-05	6.28374e-05	2.61401e-05	8.81011e-05	5.15319e-05	8.18022e-05	5.33422e-05	7.29881e-05	5.19144e-05	7.23426e-05	7.86648e-05	8.29407e-05	5.98806e-05	2.48714e-05	5.02165e-05
PC O-34:1_A	0.00386477	0.00466342	0.0065565	0.00514302	0.00478913	0.00253877	0.00432487	0.00393221	0.00621374	0.00400831	0.00537012	0.00334947	0.00339259	0.00593772	0.0061801	0.00559438	0.00226164	0.00455406
PC O-34:1_B	6.38725e-05	6.67511e-05	0.00016871	0.000111087	9.78461e-05	2.76024e-05	8.36928e-05	6.414e-05	0.000150951	7.83976e-05	0.000117261	6.04571e-05	5.12277e-05	0.000113146	0.000127628	0.00012816	9.96088e-06	7.32031e-05
PC O-34:2_A	0.000229657	0.000328965	0.000440447	0.000258689	0.00037447	0.00014185	0.000262087	0.000258954	0.000306187	0.000352326	0.000283647	0.000195015	0.000216718	0.000461247	0.000365066	0.000307154	0.000141079	0.00033774
PC O-34:2_B	0.000432285	0.000541176	0.000602049	0.000406045	0.000589382	0.000316509	0.000381567	0.000493257	0.000611647	0.000501516	0.0003762	0.000330526	0.00041603	0.000633214	0.000543535	0.000491002	0.000277883	0.00055718
PC O-34:3_A	5.01289e-05	5.03191e-05	6.80003e-05	3.91994e-05	6.35808e-05	3.36913e-05	5.51801e-05	6.04132e-05	7.35954e-05	4.31268e-05	4.86504e-05	3.71359e-05	3.59613e-05	7.24958e-05	6.30304e-05	5.00476e-05	3.53652e-05	5.22132e-05
PC O-34:3_B	0.000162614	0.000152	0.000201945	0.000209223	0.000155707	0.000151725	0.000193392	0.000133258	0.000206683	0.0001312	0.000184045	0.000186644	0.000154799	0.000142157	0.000189965	0.00019661	0.000158311	0.000146935
PC O-35:2	0.000211041	0.000319	0.000204456	0.000130066	0.000289827	0.000121658	0.000217649	0.000322304	0.000253216	0.000299365	0.000171493	0.000143382	0.000179384	0.00030845	0.000246408	0.000143358	0.000107534	0.000233954
PC O-36:1	0.000129025	0.000156851	0.000222642	0.000180893	0.000174513	6.64043e-05	0.000133234	0.000147805	0.000170083	0.00013349	0.000171302	0.000101204	0.000160023	0.000219613	0.000217119	0.000188213	5.39338e-05	0.000141914
PC O-36:2	0.000470748	0.00096617	0.00108489	0.000793589	0.00095318	0.000283204	0.000488738	0.000735863	0.000913781	0.000622895	0.000867819	0.000359285	0.000417065	0.0011928	0.00110915	0.000993106	0.000271297	0.000901935
PC O-36:3_A	0.000119374	0.000215706	0.000210846	0.000158783	0.000224261	6.93941e-05	0.000127575	0.000172306	0.000216494	0.000185186	0.000162486	0.00010457	9.70773e-05	0.000234718	0.000200954	0.000166448	5.66587e-05	0.000202297
PC O-36:3_B	0.000266262	0.00036382	0.000491099	0.000429054	0.000322577	0.000234169	0.000301818	0.0003066	0.000508212	0.000260707	0.000450307	0.000274675	0.000298636	0.00039046	0.000531098	0.000480674	0.00024009	0.000301443
PC O-36:4	0.000476984	0.000370658	0.000895301	0.000956054	0.000541631	0.000585778	0.000643208	0.000397543	0.000892052	0.00049278	0.000775496	0.000823733	0.000537452	0.000473458	0.000660992	0.000894104	0.000536785	0.000489564
PC O-36:5	0.000228914	0.000150404	0.000369064	0.000581911	0.000182303	0.000434961	0.000315582	0.000142555	0.000355236	0.000161901	0.000356077	0.000521447	0.000238645	0.000132334	0.00030792	0.000438123	0.000468078	0.000166611
PC O-37:4	0.000453427	0.00106099	0.000579624	0.000415547	0.000600826	0.000321815	0.000427066	0.000742621	0.000616429	0.000492532	0.000494083	0.000347225	0.000418223	0.000925301	0.000854053	0.000552305	0.000295207	0.000572338
PC O-38:2	4.44808e-05	0.000138553	0.000145836	7.22033e-05	0.00011571	0	4.09299e-05	9.49166e-05	0.000112187	7.08436e-05	9.66275e-05	3.0415e-05	3.09284e-05	0.000171566	0.000161559	0.000135503	0	9.02629e-05
PC O-38:3_A	0	6.64492e-05	6.09279e-05	0	6.2394e-05	0	0	0	1.67837e-05	0	1.65662e-05	0	0	8.56427e-05	6.94016e-05	5.79142e-05	0	5.39118e-05
PC O-38:3_B	2.1594e-05	4.44593e-05	6.71698e-05	3.56248e-05	4.20899e-05	0	2.86495e-05	1.51564e-05	5.65839e-05	8.89847e-06	4.10631e-05	1.85565e-05	9.03322e-06	6.00142e-05	7.31168e-05	6.84447e-05	0	4.41575e-05
PC O-38:4_A	0.000114835	0.000108945	0.000186196	0.000154655	0.000141925	0.000101061	0.000137102	7.37858e-05	0.00018477	9.62484e-05	0.000166433	0.00015856	8.26076e-05	0.000134148	0.000172945	0.00021435	9.6148e-05	0.000133898
PC O-38:4_B	8.97984e-05	9.6032e-05	0.000173053	0.000191957	9.328e-05	6.06088e-05	0.000115087	5.661e-05	0.000155823	4.60161e-05	0.000130839	0.000108981	6.15858e-05	0.000115386	0.000178722	0.000182199	7.02113e-05	8.64738e-05
PC O-38:5	2.74203e-05	8.90141e-06	4.76235e-05	5.07495e-05	1.98301e-05	3.41784e-05	3.32439e-05	0	4.94044e-05	1.89016e-06	3.2424e-05	4.24542e-05	2.76066e-05	1.53258e-05	4.71968e-05	4.53653e-05	3.7712e-05	2.34231e-05
PC O-38:5_A	0.000488928	0.000381393	0.000867584	0.000826722	0.000552337	0.000527533	0.000577263	0.000344969	0.000757353	0.00042747	0.000658539	0.000645473	0.000435206	0.00052551	0.000707604	0.000861041	0.000508131	0.000535853
PC O-38:5_B	0.000109417	4.13476e-05	0.000175305	0.000205702	7.69192e-05	0.000192192	0.000152191	4.29197e-05	0.000155421	3.86506e-05	0.000150079	0.000212015	0.000109484	7.60203e-05	0.000177531	0.000225181	0.000198274	6.70129e-05
PC O-38:6	0.00043727	0.000253902	0.000652349	0.000676076	0.0003391	0.000551112	0.000606283	0.000279728	0.000655072	0.000306347	0.000549139	0.000681272	0.000443029	0.000280009	0.000529543	0.000634169	0.000564495	0.000304347
PC O-40:2	7.73456e-05	9.96173e-05	0.000133988	7.24898e-05	0.000105123	3.0263e-05	8.17522e-05	0.000103249	0.000131459	9.98466e-05	9.78843e-05	7.29722e-05	5.10572e-05	0.000127043	0.000128917	0.000102372	2.50789e-05	7.98174e-05
PC O-40:5_A	2.82419e-05	0	4.78488e-05	3.91541e-05	3.45776e-05	2.94401e-05	2.81011e-05	0	2.91591e-05	0	4.16545e-05	3.72199e-05	0	2.57417e-05	4.94752e-05	7.35569e-05	2.40408e-05	3.84774e-05
PC O-40:5_B	5.50754e-05	2.74277e-05	7.69416e-05	6.02967e-05	4.7703e-05	3.3371e-05	8.72294e-05	1.97911e-05	6.21115e-05	1.96223e-05	5.10509e-05	5.48263e-05	3.92956e-05	3.71924e-05	7.53996e-05	6.17852e-05	3.66671e-05	3.59552e-05
PC O-40:6	0.000118299	0.000100794	0.000199691	0.000138929	0.000123327	0.000103064	0.000129869	6.93037e-05	0.000157781	8.31477e-05	0.000135093	0.000105479	0.000114738	0.000133694	0.000186356	0.000200345	0.000107975	0.000121884
PC P-32:1	0.000380505	0.000232	0.000377821	0.000281781	0.000317698	0.000272606	0.000493148	0.000271294	0.000425664	0.000297219	0.000307052	0.000352548	0.000322191	0.000272717	0.000365954	0.000255626	0.000279503	0.000267606
PC P-34:1	0.000710532	0.00053252	0.000875307	0.000876952	0.000594019	0.000688553	0.000844738	0.000556845	0.000966555	0.000535906	0.00090824	0.000810653	0.000654178	0.000580571	0.00093815	0.000905624	0.000704826	0.0005543
PC P-36:5_A	3.90347e-05	0	2.8508e-05	4.18011e-05	8.09254e-06	3.68669e-05	4.92738e-05	0	2.68895e-05	0	3.56272e-05	4.57077e-05	6.13958e-05	8.13353e-06	3.13769e-05	3.40466e-05	3.60473e-05	1.77487e-05
PC P-36:5_B	1.93112e-05	0	1.16787e-05	2.95479e-05	0	2.2745e-05	2.2413e-05	0	9.47983e-06	0	1.68495e-05	2.19884e-05	5.97593e-05	0	1.51837e-05	2.08108e-05	1.92452e-05	0
PC P-37:2	0.000286976	0.000605136	0.000322271	0.000203651	0.000442074	0.000175664	0.000281528	0.000520799	0.000387732	0.000440155	0.000283872	0.000198009	0.000240723	0.000542852	0.000414446	0.000254404	0.000153937	0.000375457
PC P-38:6	0.00013262	4.22833e-05	0.00019515	0.000282058	6.27036e-05	0.000230692	0.000207458	6.08342e-05	0.000210806	7.35499e-05	0.000174789	0.00028196	0.000146838	4.49056e-05	0.000158679	0.000219205	0.000253578	7.4709e-05
PC P-39:1	0	3.00328e-05	1.7805e-05	0	0	0	0	0.000103535	9.92349e-05	0	0	0	0	2.77327e-05	0	5.77896e-05	0	5.23614e-05
PC P-40:6	0.000173905	0.00010666	0.00030195	0.000265845	0.000162283	0.000194796	0.000211958	8.97364e-05	0.000246061	0.000106913	0.000219963	0.00020927	0.000160326	0.00013886	0.00026862	0.000307621	0.000195876	0.000160238
SM 32:1;O2	0.000219346	0.00014049	0.000218539	0.000245494	0.000148379	0.000220163	0.000217371	0.00013113	0.000180683	0.000113622	0.000206286	0.000211589	0.000209701	0.000153011	0.000171565	0.000230617	0.000219363	0.000174241
SM 33:1;O2	0.000403486	0.000171615	0.000359825	0.000462093	0.000241925	0.000374879	0.000447244	0.000224627	0.000319028	0.000186955	0.000415044	0.000352628	0.000393755	0.000211646	0.000281119	0.000424463	0.000371541	0.000264633
SM 34:0;O2	0.00251174	0.00378734	0.00635573	0.00689053	0.00368198	0.00293264	0.0026977	0.00347272	0.00569424	0.00275828	0.0058651	0.00297307	0.00240532	0.00341382	0.00562761	0.00597751	0.00286912	0.00257974
SM 34:1;O3	0.000287174	0.000229422	0.000389592	0.000410764	0.000446249	0.000400844	0.000372236	0.000321807	0.000375266	0.000364053	0.000448311	0.000442142	0.000308738	0.000286269	0.000346683	0.000470339	0.000403471	0.000393919
SM 34:1;O2_A	0.0204236	0.0218203	0.0214411	0.0216588	0.0196974	0.021247	0.019912	0.0177862	0.0190446	0.0140737	0.0204857	0.0201204	0.0210145	0.0222412	0.0215796	0.0228455	0.0232941	0.0210118
SM 34:1;O2_B	0.00108683	0.00109538	0.00121944	0.00122826	0.000996473	0.00120777	0.00100973	0.000979985	0.00104861	0.000832135	0.00114931	0.00112726	0.00102287	0.00102379	0.00103485	0.00138383	0.00123521	0.00103972
SM 34:2:O2	0.000362819	0.000274436	0.00039764	0.00047979	0.000264181	0.000447647	0.000331475	0.00024107	0.00031125	0.000200455	0.000413555	0.000388105	0.000345665	0.000307992	0.00033306	0.000479042	0.000425689	0.000295981
SM 36:1;O2	0.000125351	0.000129441	0.000140245	0.00015951	0.000108611	0.000173931	0.000178255	0.00013132	0.000174346	8.57616e-05	0.000122544	0.000169184	0.00012843	0.000110839	0.000126002	0.000119231	0.000181787	9.77515e-05
SM 38:1;O2	5.03618e-05	4.44918e-05	5.40783e-05	5.66446e-05	5.29308e-05	5.09722e-05	8.00273e-05	4.71279e-05	6.014e-05	3.21908e-05	5.65915e-05	6.07577e-05	4.55687e-05	4.57413e-05	5.48119e-05	5.1957e-05	5.24008e-05	4.38327e-05
SM 40:0;O2	0	0	1.78345e-05	3.15478e-05	7.40076e-06	0	1.24737e-05	0	1.78884e-05	0	2.26701e-05	0	0	0	1.54446e-05	9.78194e-06	0	0
SM 40:1;O2_A	0	5.81366e-05	6.79997e-05	5.8882e-05	5.92503e-05	0	1.28975e-05	3.949e-05	6.26916e-05	2.71458e-05	6.03871e-05	0	0	4.36607e-05	7.69432e-05	4.72792e-05	0	1.76958e-05
SM 40:1;O2_B	0.00108505	0.00115305	0.00111703	0.00106644	0.00118698	0.00109533	0.00125717	0.00105242	0.00113692	0.000993392	0.00101557	0.00114684	0.000966363	0.0011181	0.00112463	0.00104774	0.00118571	0.00111543
SM 40:2;O2	0.00086933	0.001983	0.00110025	0.00093805	0.00146361	0.000797957	0.000891966	0.00125421	0.00103725	0.00100706	0.00101371	0.000737952	0.000724713	0.00170606	0.00125407	0.00104019	0.000864298	0.00133505
SM 41:1;O2	0.000532205	0.000358185	0.000458256	0.000478132	0.000494062	0.000478023	0.000621092	0.000395934	0.000470093	0.000461859	0.00045462	0.000571274	0.000501048	0.000396478	0.000419299	0.000427704	0.000529093	0.000482394
SM 41:2;O2	0.000662417	0.000410959	0.000498894	0.000516671	0.000504159	0.000603499	0.00070726	0.000407738	0.000479814	0.000433358	0.000524193	0.000620394	0.000626574	0.000439647	0.000495481	0.000505402	0.000655928	0.000527867
SM 42:1;O2	0.00357299	0.00285613	0.00320178	0.00285419	0.00390033	0.00357929	0.00432247	0.00290844	0.00345419	0.00378617	0.00283527	0.00411744	0.00343763	0.00298664	0.00293898	0.0026725	0.00368628	0.00362748
SM 42:2;O2	0.0129531	0.0154432	0.0129397	0.0121581	0.0144435	0.0132503	0.0140329	0.0127744	0.0130602	0.0125319	0.0135023	0.0143289	0.0114141	0.0149644	0.0142887	0.0129627	0.0137666	0.0135882
SM 43:1;O2	6.91918e-05	1.46637e-05	3.94215e-05	3.01278e-05	5.64888e-05	6.02719e-05	9.3123e-05	3.18597e-05	4.34344e-05	6.20814e-05	3.01517e-05	7.66026e-05	5.53685e-05	1.96975e-05	3.22312e-05	1.94639e-05	5.7279e-05	5.40838e-05
SM 43:2;O2	0.000155548	5.98855e-05	9.01738e-05	7.26629e-05	0.000113112	0.000128632	0.000189605	7.50466e-05	0.000103019	0.000119139	8.41781e-05	0.000156623	0.000132214	7.47783e-05	8.2324e-05	6.55739e-05	0.000128124	0.000114059
SM 44:2;O2	0.000195792	0.000167915	0.000148858	9.35027e-05	0.000226016	0.00017022	0.000251923	0.000176354	0.000162637	0.000247034	0.000108224	0.000209679	0.000168921	0.000158491	0.000136448	9.04203e-05	0.000161668	0.000207971
SPB 16:0;O2	0.00404241	7.20544e-05	0.00297855	0.000976144	0.00096503	0.00216511	0.00528054	5.97842e-05	0.00434187	0.000669533	9.73538e-05	0.00165741	0.00660279	0.000122256	0.00429407	0.00103098	0.00192122	0.000731681
SPB 16:1;O2	7.6177e-06	0	0	0	0	1.54666e-05	4.0956e-05	0	1.79328e-05	0	0	5.07108e-05	6.34551e-05	0	0	0	6.11512e-05	0
SPB 18:0;O2_A	0	0.000104633	2.05267e-05	0	1.39209e-05	0	0	5.96135e-05	2.57951e-05	0	0	0	0	0.000103384	7.65873e-05	0	0	1.30547e-05
SPB 18:0;O2_B	0.000543119	1.85561e-07	0.000472185	0.000128008	0.000128284	0.000256924	0.000529908	1.09309e-07	0.000448593	8.68931e-05	0	0.000206442	0.00110047	0	0.000649715	0.00015304	0.000267862	0.000102166
SPB 18:0;O2_C	0.000514789	0	0.000390114	0.000124259	0.000123631	0.000242096	0.000605636	0	0.000404607	7.59368e-05	0	0.000200582	0.000884186	0	0.000502274	0.000120939	0.000252427	8.66533e-05
SPB 18:1;O2	2.564e-05	0	3.49017e-05	6.84121e-05	2.3214e-05	3.01805e-05	5.08931e-05	0	3.69231e-05	0	4.48816e-05	4.15192e-05	4.13249e-05	0	3.27522e-05	1.40195e-05	0.000101658	1.61923e-05
SPB 20:0;O2	0.000183313	0	0.000213071	6.2469e-05	0.000106669	0.000202145	0.000142605	0	0.000179862	0.000110857	0	0.000195219	0.000479029	3.04303e-05	0.000321986	7.56024e-05	0.000277223	0.000101347
TG 40:0	1.58663e-05	0	1.00091e-05	1.88692e-05	8.96314e-06	1.92541e-05	2.42072e-05	0	1.02297e-05	1.09575e-05	9.86442e-06	1.82623e-05	5.51621e-05	0	7.83051e-06	1.0578e-05	1.43034e-05	9.20642e-06
TG 42:0	2.90686e-05	1.36033e-05	1.70127e-05	1.68675e-05	1.81491e-05	2.70022e-05	4.11433e-05	1.89808e-05	1.53974e-05	2.59574e-05	1.61079e-05	2.59905e-05	7.446e-05	1.18334e-05	1.43859e-05	1.28189e-05	2.21483e-05	1.74897e-05
TG 44:1	0.000109859	4.85341e-05	5.22803e-05	3.66126e-05	7.29315e-05	6.8054e-05	0.000144786	8.41472e-05	5.63077e-05	0.000104958	4.07057e-05	9.05053e-05	0.000142883	3.68195e-05	4.27755e-05	3.19549e-05	5.49133e-05	6.00614e-05
TG 45:0	0.000124287	0.00010004	9.12147e-05	0.000117318	9.78976e-05	0.000130382	0.000171758	0.000112603	9.17152e-05	0.000122413	8.52362e-05	0.00012621	0.000387397	7.12955e-05	6.59804e-05	0.000102065	0.000138304	9.66633e-05
TG 46:0	0.00110467	0.000591624	0.000640362	0.000673665	0.000853991	0.000977429	0.00132673	0.000982655	0.000743333	0.00111912	0.00079319	0.00121261	0.00160977	0.000544775	0.000577839	0.000724404	0.000861325	0.000785242
TG 46:1	0.000791641	0.000436515	0.000437717	0.000335213	0.000592373	0.000531841	0.00091922	0.000712205	0.000502412	0.000827648	0.000424848	0.000710918	0.00083245	0.000347258	0.00040139	0.000387896	0.000434286	0.000535764
TG 46:2	0.000168669	9.95254e-05	0.000106005	8.08733e-05	0.000141012	0.000120634	0.000208758	0.000163523	0.000104892	0.000195881	9.46959e-05	0.000150958	0.000203228	7.12462e-05	8.73714e-05	8.82659e-05	9.66242e-05	0.000114273
TG 47:0	0.000294361	0.000215892	0.000229634	0.000287455	0.000242297	0.000329473	0.000369105	0.000266075	0.000213942	0.000301754	0.00023388	0.000315504	0.000788658	0.000171854	0.000171199	0.000247696	0.000312133	0.000238181
TG 47:1	0.000100965	5.05687e-05	6.00245e-05	7.65558e-05	8.30587e-05	8.48513e-05	0.00014617	8.03947e-05	6.35099e-05	9.61936e-05	6.36521e-05	0.000105361	0.00017902	3.89272e-05	3.73468e-05	6.46953e-05	8.8417e-05	6.21277e-05
TG 48:0	0.00160708	0.000865184	0.00101554	0.00160941	0.00158268	0.00196187	0.00195861	0.00137793	0.00117931	0.00196826	0.00190011	0.00251597	0.00216103	0.000828474	0.000922179	0.00166241	0.00169417	0.00155178
TG 48:1	0.00283598	0.00203456	0.00186218	0.00188554	0.00279885	0.00239869	0.00321375	0.00319362	0.00210822	0.00346493	0.00264628	0.00302679	0.00287155	0.00178186	0.00188975	0.00239461	0.00201493	0.00255274
TG 48:2	0.000971262	0.000780042	0.000675341	0.000549002	0.000958608	0.00072714	0.00107239	0.00111858	0.000743605	0.00126162	0.000779267	0.000975247	0.00100647	0.000613443	0.00065309	0.000729727	0.000604678	0.000877479
TG 48:3	9.99359e-05	7.71376e-05	7.45759e-05	3.60003e-05	0.000120574	6.04717e-05	0.000133366	0.000115573	6.64595e-05	0.000145368	8.48852e-05	0.000106372	0.000126203	4.98972e-05	7.07693e-05	6.74141e-05	1.77355e-05	9.83181e-05
TG 49:0	0.000181133	0.000109716	0.000124924	0.00018617	0.000148782	0.000210178	0.000214908	0.000144311	0.000128331	0.0001685	0.000151916	0.000203423	0.000478522	9.59751e-05	0.000101224	0.00017033	0.000213936	0.00015392
TG 49:1	0.000334354	0.000171144	0.000222706	0.000304576	0.000273448	0.000322248	0.000411198	0.000266394	0.000200739	0.000335177	0.000304312	0.000366808	0.000474348	0.00014405	0.000173025	0.00030293	0.000295995	0.000254695
TG 49:2	9.47939e-05	6.2783e-05	5.92749e-05	8.26641e-05	9.18363e-05	8.46174e-05	0.000135097	8.76718e-05	6.35544e-05	0.000105947	7.95408e-05	0.0001004	0.000157645	4.6951e-05	5.06541e-05	8.36415e-05	8.07502e-05	8.07108e-05
TG 50:0	0.000337779	0.000214418	0.000231001	0.000368233	0.000325435	0.000419671	0.000375999	0.000320815	0.000248788	0.000358794	0.000360928	0.000437681	0.000721343	0.000203837	0.000229912	0.000384267	0.000432724	0.000339863
TG 50:1	0.00490306	0.00431344	0.00372846	0.00540377	0.00587174	0.00521066	0.00529975	0.00535078	0.00406333	0.008045	0.00694797	0.00612285	0.00497621	0.00375818	0.00392298	0.00658019	0.00466658	0.00591257
TG 50:2	0.002901	0.00324032	0.00229955	0.00244594	0.00375426	0.00249411	0.00308792	0.00418143	0.00247484	0.00470672	0.00365896	0.0030094	0.00293726	0.0026496	0.00255843	0.00349058	0.00214586	0.00364797
TG 50:3	0.000518233	0.000621239	0.000454575	0.00040667	0.00068067	0.000428379	0.000533667	0.000755449	0.000463464	0.000859064	0.000609513	0.000555448	0.000526121	0.000465917	0.000480893	0.000607681	0.000351521	0.000658706
TG 51:0	2.93745e-05	1.4287e-05	2.30727e-05	3.6666e-05	2.9193e-05	4.20959e-05	4.05975e-05	2.20824e-05	2.00094e-05	2.53166e-05	2.67301e-05	3.39012e-05	9.82358e-05	0	1.83517e-05	3.11668e-05	3.99871e-05	3.03532e-05
TG 51:1	0.000225891	0.00011023	0.000148241	0.000262684	0.000204486	0.000235522	0.000259688	0.000183494	0.000145845	0.00024658	0.000257838	0.000272559	0.000294127	0.000106316	0.000140959	0.000269222	0.000229688	0.000207452
TG 51:2	0.000279898	0.000198299	0.000212977	0.000308015	0.000281534	0.000253019	0.000318987	0.000285149	0.000200102	0.000386141	0.000336973	0.000295555	0.00036476	0.000175436	0.000195407	0.000350218	0.000235249	0.000299551
TG 51:3	3.98921e-05	1.4901e-05	2.54781e-05	3.81324e-05	4.66361e-05	2.01647e-05	5.6432e-05	4.92752e-05	1.90722e-05	6.24496e-05	4.74475e-05	4.00373e-05	5.51807e-05	8.63857e-06	2.47223e-05	5.01646e-05	1.88052e-05	4.89586e-05
TG 52:0	8.37203e-05	7.25156e-05	6.25315e-05	9.4818e-05	7.66499e-05	0.000104997	9.5912e-05	8.92208e-05	7.54827e-05	8.31242e-05	7.80926e-05	0.000102959	0.000292191	6.76367e-05	6.12289e-05	9.58381e-05	0.000123478	8.26318e-05
TG 52:2	0.00419976	0.00630959	0.00388524	0.0054489	0.00679954	0.00418266	0.00493894	0.00643099	0.0040321	0.0149834	0.00746488	0.00514145	0.00438653	0.00501064	0.00471511	0.00747524	0.00397215	0.00732757
TG 52:3	0.00131283	0.00210154	0.00123753	0.00144284	0.00220262	0.00121191	0.00141375	0.00230919	0.00122685	0.00367079	0.00211519	0.00149731	0.00142222	0.00159541	0.00143637	0.00216551	0.00107241	0.00227323
TG 52:4	0.000132704	0.000152912	0.000119192	0.000124337	0.00016152	0.000117257	0.000140479	0.000183033	0.000114893	0.000239852	0.000157297	0.000144832	0.00018068	0.000110852	0.00012332	0.000170776	0.000117823	0.000179102
TG 53:1_A	0.000539602	0.000516468	0.000423366	0.000609521	0.000610693	0.000548772	0.000580842	0.00059559	0.000473874	0.000820944	0.000788127	0.000682081	0.000547828	0.000436345	0.000448451	0.000739476	0.000493441	0.000637859
TG 53:1_B	3.53451e-05	9.8514e-06	2.08718e-05	4.35173e-05	3.99089e-05	4.10466e-05	4.83605e-05	3.14488e-05	1.94928e-05	4.02764e-05	4.53099e-05	4.54165e-05	5.76039e-05	7.93592e-06	1.9134e-05	4.38675e-05	3.38118e-05	4.44455e-05
TG 53:2	0.000201268	0.00015477	0.000152869	0.000279694	0.000254294	0.000186543	0.000210611	0.00021472	0.000153953	0.000308014	0.000323464	0.000217376	0.000231341	0.000145118	0.000170865	0.000349127	0.000188901	0.000286464
TG 53:3	0.00010632	0.00012697	9.83016e-05	0.0001475	0.000150399	9.7513e-05	0.000117396	0.000149782	7.38609e-05	0.000273782	0.000178952	0.000115789	0.000132294	0.000103168	0.00011515	0.000199754	8.37203e-05	0.000183837
TG 54:0	6.42616e-05	5.43504e-05	5.49262e-05	6.22124e-05	5.61127e-05	7.50024e-05	7.98688e-05	7.15096e-05	5.87034e-05	6.82862e-05	5.39714e-05	7.69474e-05	0.000228746	4.56426e-05	4.52593e-05	7.09037e-05	8.60797e-05	5.81288e-05
TG 54:1	0.000202771	0.000165728	0.000129304	0.000205815	0.000248381	0.000216288	0.000265693	0.000260403	0.000162009	0.000322232	0.000224613	0.000259836	0.000284655	0.000134438	0.00014105	0.000215117	0.000196101	0.000242209
TG 54:2	0.000941924	0.00162963	0.000915815	0.00122792	0.00183973	0.000938285	0.00115876	0.00170423	0.000983982	0.00241648	0.00160914	0.00108356	0.00109518	0.00134906	0.00120873	0.00172346	0.00093518	0.00196545
TG 54:3	0.00214571	0.00344928	0.00206448	0.00284876	0.00364491	0.00221813	0.00349279	0.00317407	0.0020019	0.014377	0.00357173	0.00317999	0.00253271	0.00264118	0.00238121	0.00376514	0.00227396	0.00416502
TG 54:4	0.000859696	0.000988205	0.000727893	0.00102298	0.000969529	0.00094739	0.00105165	0.000963137	0.000654563	0.00188727	0.00107215	0.00115161	0.00106336	0.000761643	0.000724942	0.00119445	0.00094037	0.00108834
TG 54:5	0.000205091	0.000226907	0.000169147	0.000287601	0.00025678	0.000289208	0.000229395	0.000243518	0.000169043	0.00023451	0.000350858	0.000391556	0.000193998	0.000140817	0.000183686	0.00035373	0.000275128	0.000316266
TG 54:7	1.81757e-05	0	1.29077e-05	1.89646e-05	0	1.99365e-05	2.3559e-05	0	8.62223e-06	0	9.00574e-06	2.6833e-05	3.23139e-05	0	0	9.67163e-06	2.05173e-05	0
TG 55:2	6.03482e-05	4.0022e-05	4.39183e-05	6.91346e-05	8.67292e-05	5.02712e-05	6.79614e-05	6.41535e-05	4.09777e-05	8.03615e-05	9.33645e-05	5.90908e-05	7.67271e-05	3.43148e-05	5.13534e-05	9.45928e-05	5.09528e-05	0.000106033
TG 55:3	5.69849e-05	7.71141e-05	5.13896e-05	9.87778e-05	0.000120861	4.96584e-05	6.1895e-05	9.35786e-05	4.56193e-05	0.000106462	0.000135458	5.80544e-05	5.56625e-05	6.45692e-05	7.9352e-05	0.000152525	3.88923e-05	0.000152664
TG 56:1	8.66431e-05	4.70276e-05	4.19035e-05	6.30779e-05	9.33356e-05	7.65262e-05	0.000127814	0.000126301	6.513e-05	0.000129862	8.77586e-05	0.000115915	0.000111632	3.33369e-05	3.70255e-05	6.57314e-05	6.24281e-05	7.73807e-05
TG 56:3	0.000370281	0.000991688	0.000437214	0.000552768	0.00098908	0.000363556	0.000383389	0.000878505	0.000441692	0.000828947	0.000800683	0.000399286	0.00039069	0.000757859	0.000646667	0.000899398	0.00035464	0.00116318
TG 56:4	0.000176961	0.000490105	0.000223387	0.000307378	0.000475745	0.000205434	0.000190437	0.000415509	0.000208647	0.000366047	0.00043518	0.000240284	0.000191642	0.000368567	0.000324674	0.000503264	0.000199428	0.000611116
TG 56:6	0.000206649	0.00022381	0.000201957	0.000342318	0.000292289	0.000323362	0.000240089	0.000245766	0.000168631	0.000222772	0.000413946	0.000396518	0.000191615	0.000158005	0.000239547	0.000452293	0.000325281	0.000363639
TG 56:7	7.81668e-05	6.45198e-05	8.59113e-05	0.000133028	8.96728e-05	0.00012551	9.14411e-05	8.0199e-05	7.65455e-05	8.54491e-05	0.000167779	0.000159661	7.54053e-05	5.64582e-05	8.63399e-05	0.000187161	0.000127628	0.000114424
TG 57:3	1.56887e-05	1.81333e-05	1.54464e-05	2.76603e-05	3.74576e-05	1.20234e-05	1.88946e-05	2.72495e-05	1.40082e-05	2.51111e-05	3.86923e-05	1.52087e-05	1.6805e-05	1.51772e-05	1.78306e-05	4.1876e-05	1.07203e-05	4.66374e-05
TG 58:0	1.12589e-05	0	0	1.10049e-05	1.11829e-05	1.37552e-05	1.6654e-05	1.22382e-05	9.87926e-06	1.13463e-05	9.38099e-06	1.45859e-05	5.20941e-05	0	0	0	1.24279e-05	0
TG 58:2	0.000246525	0.000212921	0.000162525	0.000197859	0.00034453	0.000209466	0.000318644	0.000403483	0.000204075	0.000418575	0.000295896	0.000283992	0.000248724	0.00015629	0.000169581	0.000257893	0.000166849	0.000305099
TG 58:3	0.000177478	0.000359513	0.000175286	0.000219711	0.000400212	0.000169737	0.000188285	0.000397913	0.000192718	0.00033656	0.000341018	0.000210077	0.000173014	0.000262357	0.000241937	0.000331109	0.000138273	0.00043224
TG 58:4	8.19163e-05	0.000290635	0.000118937	0.000151056	0.000257135	9.16243e-05	8.09027e-05	0.000223445	0.000103319	0.000165214	0.000221735	0.000107457	7.42417e-05	0.000216705	0.000185013	0.00025647	8.36225e-05	0.000337685
TG 58:5	7.08481e-05	0.000181865	8.86311e-05	0.000154165	0.000203461	0.000115806	7.96805e-05	0.000137618	7.67137e-05	0.00012681	0.000207046	0.000139402	6.47572e-05	0.000136011	0.000145621	0.000250233	0.000104649	0.000270177
TG 58:6	8.44924e-05	0.000150873	9.93501e-05	0.000175056	0.00019135	0.000131507	0.000104642	0.000142712	7.66958e-05	0.000131709	0.000223454	0.000175946	7.60278e-05	0.000109204	0.000142555	0.000259085	0.000133986	0.000240491
TG 58:8	9.98427e-06	1.07361e-05	1.84499e-05	3.97124e-05	3.43548e-05	3.52453e-05	2.72724e-05	2.95363e-05	1.11163e-05	2.27711e-05	6.08816e-05	4.75107e-05	1.01717e-05	0	2.27602e-05	6.46664e-05	3.82715e-05	4.91507e-05
TG 60:4	3.14118e-05	0.000119481	4.25295e-05	5.56606e-05	0.000115171	1.97602e-05	3.72382e-05	0.000110586	4.20919e-05	7.63931e-05	9.35956e-05	4.85963e-05	2.40121e-05	7.6385e-05	6.87807e-05	9.74111e-05	1.5826e-05	0.000146234
TG 62:0	8.60822e-06	9.42094e-06	0	1.05209e-05	8.47924e-06	1.08313e-05	8.15151e-06	1.07362e-05	8.99095e-06	0	7.47874e-06	0	3.31868e-05	0	0	0	0	0
TG 62:4	0	1.74898e-05	0	0	2.50104e-05	0	6.75388e-06	2.82893e-05	0	1.81069e-05	2.09131e-05	7.9662e-06	0	9.04867e-06	1.2414e-05	1.71348e-05	0	3.02162e-05
CL 70:5	0.000127072	0.00012195	0.000139919	0.00013449	0.000111538	0.000139724	0.000140253	0.000136413	0.000143612	0.00011156	0.00014747	0.000156252	0.000131329	0.000136205	0.000146156	0.000146723	0.000146658	0.000105271
CL 70:6	3.769e-05	3.40027e-05	4.16289e-05	4.8371e-05	3.78571e-05	4.8949e-05	3.76537e-05	2.72796e-05	3.47772e-05	3.16202e-05	4.70561e-05	4.88832e-05	4.45619e-05	3.83506e-05	4.3262e-05	5.7315e-05	5.27761e-05	4.08599e-05
CL 72:2	3.31982e-05	4.94612e-05	2.47766e-05	1.831e-05	3.77376e-05	2.13596e-05	3.30128e-05	3.75945e-05	2.37042e-05	2.50898e-05	2.71152e-05	1.66596e-05	2.94291e-05	4.46116e-05	3.1879e-05	2.13586e-05	2.00489e-05	3.80245e-05
CL 72:8	2.76603e-05	2.5047e-05	3.33439e-05	3.15483e-05	2.78142e-05	3.35571e-05	3.32915e-05	3.07872e-05	3.55622e-05	2.19618e-05	3.36692e-05	3.73364e-05	3.04156e-05	3.22214e-05	3.58848e-05	3.72519e-05	3.814e-05	2.45442e-05
CL 74:3	2.31738e-05	4.03482e-05	2.1577e-05	1.51914e-05	3.44003e-05	1.24286e-05	2.32167e-05	3.25277e-05	1.79697e-05	2.40727e-05	2.45634e-05	1.03675e-05	1.99645e-05	3.88419e-05	2.84769e-05	1.99194e-05	1.51753e-05	3.60898e-05
CL 76:5	2.33889e-05	2.39116e-05	1.8551e-05	1.96218e-05	2.42583e-05	1.88655e-05	2.05715e-05	2.04027e-05	1.75606e-05	1.78279e-05	2.45844e-05	1.6649e-05	2.07602e-05	2.45819e-05	2.28826e-05	2.2058e-05	1.93687e-05	2.72044e-05
LPE 16:0	3.02435e-05	2.26955e-05	1.82153e-05	2.50216e-05	2.70553e-05	2.57878e-05	3.41071e-05	2.13253e-05	1.79293e-05	2.76783e-05	2.16874e-05	2.77955e-05	4.11251e-05	2.24714e-05	2.12313e-05	2.37689e-05	3.43862e-05	3.23514e-05
LPE 18:0	4.39031e-05	3.74158e-05	3.18359e-05	4.18067e-05	4.02777e-05	3.04877e-05	5.02269e-05	3.45519e-05	3.21843e-05	4.127e-05	4.26393e-05	3.45845e-05	5.8624e-05	4.25292e-05	3.57944e-05	4.1945e-05	3.74622e-05	4.79436e-05
LPE 18:1	3.40067e-05	2.70182e-05	2.07519e-05	2.78638e-05	3.43467e-05	2.04914e-05	4.06331e-05	2.82228e-05	3.50336e-05	3.41082e-05	3.56403e-05	2.31122e-05	3.69809e-05	2.94334e-05	2.18087e-05	2.43013e-05	2.22865e-05	3.62857e-05
PE 30:1	2.06357e-05	8.73189e-06	6.89608e-06	0	1.25224e-05	1.00102e-05	2.4049e-05	1.52859e-05	8.66288e-06	1.6267e-05	0	1.25371e-05	2.01425e-05	8.04518e-06	4.61864e-06	0	5.78864e-06	1.00443e-05
PE 32:0	1.56583e-05	2.04354e-05	1.62932e-05	1.24971e-05	1.8584e-05	1.43523e-05	2.09457e-05	2.0912e-05	2.05336e-05	2.1895e-05	1.74122e-05	1.93053e-05	1.48648e-05	1.83789e-05	1.93326e-05	1.35867e-05	1.42418e-05	1.86538e-05
PE 32:1	0.000810727	0.000677751	0.000486456	0.000267536	0.000707721	0.000704151	0.000831249	0.000746652	0.000508014	0.000692355	0.000366956	0.000624731	0.00083035	0.000639667	0.000477677	0.000234315	0.000707243	0.000679992
PE 32:2	9.88908e-05	7.21747e-05	5.49371e-05	1.33621e-05	9.42549e-05	8.10183e-05	0.000105433	9.34152e-05	6.60479e-05	0.000115846	2.64001e-05	8.14167e-05	9.2856e-05	7.0898e-05	4.52909e-05	1.41665e-05	6.37204e-05	7.70821e-05
PE 33:1	7.56814e-05	3.91882e-05	3.99504e-05	3.59214e-05	4.52698e-05	5.98448e-05	7.95612e-05	4.77486e-05	4.1679e-05	4.07303e-05	3.75626e-05	5.15044e-05	8.2048e-05	4.219e-05	4.04047e-05	3.0291e-05	6.947e-05	5.05119e-05
PE 34:1	0.00261781	0.00311196	0.00210079	0.00200061	0.00230448	0.00244058	0.00265682	0.00288519	0.00225455	0.00227613	0.00220358	0.00216028	0.00284735	0.00275359	0.0022683	0.0020176	0.00253795	0.00244449
PE 34:2	0.00101834	0.00115555	0.000741983	0.000422489	0.00116595	0.000852591	0.00100444	0.00117105	0.000815381	0.00116622	0.000581875	0.000769316	0.00103542	0.00109796	0.000720705	0.00047835	0.000807746	0.00106931
PE 34:3	1.36928e-05	2.04519e-05	6.02781e-06	0	1.87507e-05	5.16269e-06	1.30444e-05	1.67636e-05	7.11011e-06	1.77348e-05	0	4.43646e-06	1.11213e-05	1.53578e-05	3.84108e-06	0	4.82e-06	1.41769e-05
PE 34:4	1.01193e-05	0	4.21327e-06	0	7.21685e-06	8.47375e-06	1.22302e-05	0	0	6.1445e-06	0	1.01962e-05	1.13797e-05	0	0	0	9.72516e-06	8.06808e-06
PE 35:1	0.000148684	9.34598e-05	9.2013e-05	0.000103532	9.4584e-05	0.000109786	0.000145316	0.000100726	9.67307e-05	9.68279e-05	0.000100399	0.000103845	0.000156698	9.71006e-05	9.22928e-05	9.59952e-05	0.000113019	0.000107504
PE 35:2	9.0507e-05	5.91094e-05	6.11e-05	4.47573e-05	7.37578e-05	6.69084e-05	9.07613e-05	6.90686e-05	6.20979e-05	7.15293e-05	5.90764e-05	5.6437e-05	0.000101836	6.86991e-05	5.90525e-05	4.85559e-05	6.69755e-05	7.84071e-05
PE 36:1	0.0020623	0.00245274	0.00194531	0.00205155	0.00204318	0.00180416	0.00205413	0.00228833	0.00211801	0.00190502	0.00218431	0.00173579	0.00220296	0.00248585	0.00215999	0.00217009	0.00189151	0.00218477
PE 36:2	0.00330489	0.00519885	0.00333752	0.00291572	0.00417027	0.00280075	0.00312621	0.00445685	0.0034372	0.00388178	0.0036541	0.00235847	0.00346188	0.00472543	0.00372716	0.00352566	0.00274383	0.00433226
PE 36:3_A	0.000171668	0.000123751	0.000136272	0.000123052	0.000182435	0.000142537	0.000162214	0.000145631	0.00014651	0.000195008	0.00015364	0.000117624	0.000158783	0.000160895	0.000143875	0.00013837	0.000133451	0.000181341
PE 36:3_B	5.92772e-05	0.000112617	6.56581e-05	6.0053e-05	6.89863e-05	6.92294e-05	5.64744e-05	9.53616e-05	5.33259e-05	7.66744e-05	6.72698e-05	4.70283e-05	7.11532e-05	9.24396e-05	6.87931e-05	7.09796e-05	7.0823e-05	6.99163e-05
PE 36:4	0.000930692	0.00065892	0.00076557	0.000971979	0.000811379	0.0014469	0.00101218	0.000717918	0.000721233	0.00075693	0.000843937	0.0013089	0.00100986	0.000671812	0.000698097	0.000613991	0.0015822	0.000884018
PE 36:5	6.52777e-05	4.03769e-05	5.21291e-05	3.79255e-05	5.54417e-05	9.76457e-05	7.61747e-05	4.84194e-05	6.04692e-05	7.24538e-05	4.76542e-05	0.000106648	6.30221e-05	4.03615e-05	4.37836e-05	3.96962e-05	7.90679e-05	5.41112e-05
PE 37:4	1.87187e-05	1.40065e-05	1.99111e-05	1.18658e-05	1.87986e-05	2.2916e-05	1.82473e-05	1.49872e-05	1.97027e-05	1.45232e-05	1.14624e-05	2.14795e-05	1.95492e-05	1.71049e-05	2.04807e-05	1.16011e-05	2.41072e-05	1.94973e-05
PE 38:1	2.33297e-05	3.6347e-05	2.34238e-05	2.58092e-05	2.71608e-05	1.68901e-05	2.12838e-05	2.52316e-05	2.17557e-05	2.00021e-05	2.86492e-05	1.94469e-05	2.21794e-05	3.05445e-05	3.08318e-05	2.97947e-05	1.7603e-05	2.91133e-05
PE 38:2_A	0.00013056	0.000221899	0.000132198	0.000143779	0.00017604	0.000111026	0.000110639	0.000167071	0.000136144	0.000147712	0.000160286	9.2816e-05	0.000134111	0.000212059	0.00016711	0.000172785	0.000118108	0.00018515
PE 38:2_B	5.64563e-05	0.000188483	9.60037e-05	6.18915e-05	8.98285e-05	3.66701e-05	4.88384e-05	0.000133014	9.27307e-05	6.85252e-05	8.3327e-05	3.61575e-05	5.64801e-05	0.000171608	0.0001184	8.46002e-05	3.56691e-05	8.84495e-05
PE 38:3_A	0.000185	0.000216451	0.000176164	0.000202565	0.000199198	0.000166737	0.000164605	0.000194576	0.00020021	0.0001745	0.000202311	0.000147158	0.000180773	0.000192326	0.00019326	0.000214609	0.000171588	0.000204539
PE 38:3_B	0.000186075	0.0003281	0.00022814	0.000210629	0.000209566	0.000137038	0.000182983	0.000251887	0.000239185	0.000181732	0.000219439	0.000130074	0.000179774	0.000304547	0.000241176	0.000216434	0.000142014	0.000197441
PE 38:4_A	0.000242983	0.000295274	0.000232922	0.000223578	0.000246626	0.000342696	0.000240921	0.00025419	0.000221615	0.000230224	0.00023839	0.000293013	0.000284782	0.000271048	0.000237512	0.000264846	0.000370449	0.000263389
PE 38:4_B	0.00101592	0.000834363	0.000972239	0.00140827	0.000873602	0.00137598	0.00104665	0.000837797	0.000969855	0.000864734	0.00119749	0.00125972	0.00112575	0.000861718	0.000915192	0.00124462	0.001434	0.0009903
PE 38:5	0.000113972	6.27435e-05	8.9494e-05	0.000103816	8.72211e-05	0.000172426	0.000134791	8.11381e-05	9.9519e-05	9.08499e-05	0.000100391	0.00015541	0.000133176	7.13209e-05	8.14529e-05	8.67966e-05	0.000187923	0.000104019
PE 38:6	0.000518673	0.000338513	0.000416919	0.000530597	0.000372941	0.000776917	0.000531875	0.000389108	0.000432881	0.000415958	0.000445134	0.000689509	0.000623602	0.000352283	0.000392534	0.00046851	0.00085054	0.000435067
PE 38:7	3.69398e-05	1.65069e-05	2.8407e-05	1.92976e-05	2.21225e-05	4.79063e-05	4.28418e-05	2.07023e-05	3.03326e-05	3.1627e-05	2.36682e-05	5.64186e-05	3.5201e-05	1.62745e-05	2.18878e-05	1.90365e-05	4.05171e-05	2.2371e-05
PE 40:1	1.36645e-05	8.10347e-06	5.14228e-06	0	8.42354e-06	0	1.60218e-05	8.4896e-06	4.91998e-06	8.8153e-06	4.07427e-06	4.72945e-06	1.30982e-05	8.98719e-06	6.89648e-06	0	0	8.5788e-06
PE 40:2	7.15755e-05	0.000122216	7.16749e-05	6.02604e-05	7.66422e-05	4.53513e-05	5.94474e-05	9.46711e-05	6.76081e-05	6.49941e-05	7.21301e-05	4.10434e-05	7.06199e-05	0.000111084	8.72739e-05	7.348e-05	4.65377e-05	8.2556e-05
PE 40:3_A	3.45069e-05	0.000107348	5.31704e-05	3.80357e-05	5.14351e-05	1.58837e-05	2.56083e-05	7.28324e-05	4.49639e-05	3.91246e-05	5.00476e-05	1.57767e-05	3.1398e-05	9.48476e-05	6.21807e-05	5.33021e-05	1.79959e-05	5.60383e-05
PE 40:3_B	1.6297e-05	3.18842e-05	1.50586e-05	2.38585e-05	1.97984e-05	1.54885e-05	1.27979e-05	2.28794e-05	1.66754e-05	1.09912e-05	2.63784e-05	1.39957e-05	1.39007e-05	2.89934e-05	2.51326e-05	2.5167e-05	1.51726e-05	2.03238e-05
PE 40:3_C	5.01679e-05	6.70053e-05	4.91283e-05	5.09491e-05	4.09999e-05	4.46454e-05	4.6911e-05	5.11831e-05	4.63923e-05	3.27751e-05	4.87317e-05	4.39131e-05	4.89769e-05	6.27023e-05	5.86954e-05	5.50116e-05	4.69167e-05	4.80561e-05
PE 40:4	0.000276647	0.000193975	0.000221937	0.000323568	0.000201395	0.000386437	0.000289284	0.000184069	0.000230469	0.000204887	0.00030899	0.000358718	0.000306208	0.000199467	0.000233295	0.000341331	0.000420714	0.000247022
PE 40:5	0.000115411	3.74527e-05	7.86933e-05	0.000127099	5.10529e-05	0.000146525	0.00012951	3.79919e-05	8.75284e-05	5.81323e-05	0.000115975	0.000140713	0.000138617	4.26195e-05	7.98303e-05	0.00010872	0.000168204	7.10453e-05
PE 40:6_A	5.35039e-05	2.52122e-05	5.12431e-05	6.66872e-05	3.86389e-05	8.86772e-05	6.08812e-05	1.97813e-05	5.33713e-05	4.3388e-05	6.98065e-05	7.95765e-05	6.38531e-05	2.6901e-05	5.1923e-05	6.03419e-05	9.19336e-05	4.93649e-05
PE 40:6_B	0.000523295	0.000313949	0.000420947	0.000551039	0.000336005	0.000594622	0.000567899	0.00032738	0.000433211	0.000327587	0.000482289	0.000579157	0.000614362	0.00033197	0.000403993	0.00049747	0.000644519	0.000398541
PE 40:7	0.000386436	0.00026254	0.000359556	0.000391253	0.000310231	0.000465444	0.000425069	0.000288162	0.000368147	0.000335343	0.000377813	0.000438542	0.000439496	0.000293216	0.000339035	0.000380426	0.000461812	0.000356094
PE 42:1	2.06446e-05	5.63816e-06	8.93882e-06	4.76245e-06	8.30172e-06	6.70778e-06	2.18598e-05	5.84668e-06	6.47002e-06	1.00237e-05	4.78278e-06	8.42464e-06	2.40797e-05	6.63716e-06	7.40366e-06	5.16671e-06	6.08922e-06	9.66531e-06
PE 42:5	1.48927e-05	0	3.72503e-06	0	7.94971e-06	1.29252e-05	1.50472e-05	0	0	4.70949e-06	6.04943e-06	1.12859e-05	1.56896e-05	3.98331e-06	5.74824e-06	0	1.39507e-05	9.72835e-06
PE O-32:0	7.85843e-06	4.18721e-06	6.81226e-06	4.84473e-06	4.91552e-06	0	1.44889e-05	8.16353e-06	1.27961e-05	1.12355e-05	9.25705e-06	8.60156e-06	4.61139e-06	7.27679e-06	4.35323e-06	0	0	4.09871e-06
PE O-36:1	6.13151e-05	6.08679e-05	4.16637e-05	5.74308e-05	5.68253e-05	3.29616e-05	8.28296e-05	6.78338e-05	6.72398e-05	7.30968e-05	8.65241e-05	6.20675e-05	5.2788e-05	6.09307e-05	4.34579e-05	6.53848e-05	2.40976e-05	5.03706e-05
PE O-36:3	0.000966166	0.00179343	0.00115428	0.000950089	0.00129135	0.000644967	0.000975297	0.00146114	0.00139544	0.00122888	0.0011632	0.000661133	0.000907725	0.00166924	0.00145898	0.00107955	0.000616974	0.00127406
PE O-36:4	7.13328e-05	4.12249e-05	3.78146e-05	8.61049e-05	8.73602e-05	5.70479e-05	0.000157096	6.13242e-05	8.249e-05	0.000108787	0.000134301	0.000126837	6.08692e-05	5.0576e-05	4.33558e-05	9.79285e-05	3.20116e-05	8.30074e-05
PE O-38:3	1.84118e-05	2.71433e-05	1.68726e-05	2.63204e-05	2.06883e-05	1.30949e-05	3.07892e-05	2.09067e-05	2.51715e-05	1.90919e-05	3.34455e-05	2.28934e-05	1.86413e-05	2.4577e-05	2.07557e-05	2.96825e-05	9.61365e-06	1.84852e-05
PE O-38:4	7.11773e-05	6.70514e-05	5.14995e-05	9.53783e-05	6.69743e-05	7.9968e-05	0.000105587	5.81422e-05	7.83855e-05	7.68521e-05	0.00011221	0.00012641	6.23428e-05	5.78405e-05	5.39527e-05	0.000111996	6.3146e-05	6.73892e-05
PE O-38:6	0.000717352	0.000505299	0.000872525	0.00108147	0.000596357	0.000856156	0.000894114	0.000540946	0.000899445	0.000600589	0.000899778	0.000945772	0.000823803	0.000561702	0.000822586	0.000975029	0.000852864	0.000666627
PE P-32:0	7.86636e-06	8.50798e-06	1.04304e-05	7.66553e-06	6.54347e-06	0	1.04785e-05	5.98641e-06	1.45328e-05	8.98335e-06	9.39255e-06	7.41735e-06	5.06253e-06	8.59059e-06	1.15063e-05	5.59305e-06	0	5.27298e-06
PE P-33:1	3.8496e-05	2.42764e-05	2.82722e-05	2.11594e-05	3.04468e-05	2.53133e-05	4.9389e-05	2.86713e-05	3.2275e-05	3.40939e-05	2.65317e-05	2.92717e-05	3.93346e-05	2.62518e-05	2.56396e-05	2.03873e-05	2.33963e-05	3.02403e-05
PE P-34:0	0.000249092	0.00024546	0.000172654	0.000234239	0.000225954	0.000157127	0.000360142	0.000233679	0.000270123	0.000302341	0.000313382	0.000245034	0.000218503	0.000249408	0.000166891	0.000241755	0.000117341	0.000220391
PE P-34:1	0.00149982	0.00164311	0.0013858	0.00114998	0.00154578	0.00101676	0.00169614	0.00155878	0.00174456	0.00162972	0.00141571	0.00116334	0.00144021	0.00166541	0.00150945	0.00122662	0.000945101	0.00145203
PE P-34:2_A	4.1739e-05	0.000107034	3.96265e-05	2.48469e-05	7.95486e-05	2.07869e-05	4.73153e-05	8.73127e-05	4.85664e-05	7.93568e-05	3.52688e-05	2.40268e-05	3.8881e-05	9.25129e-05	4.26429e-05	2.40641e-05	1.76106e-05	5.59258e-05
PE P-34:2_B	1.23467e-05	2.64147e-05	8.4202e-06	0	1.79154e-05	0	1.50198e-05	2.57267e-05	1.17659e-05	2.09204e-05	6.55364e-06	0	8.72685e-06	2.08951e-05	1.00883e-05	0	0	1.55575e-05
PE P-36:1	0.000261618	0.000327144	0.000243631	0.000206586	0.000303717	0.000160967	0.000267103	0.000313302	0.000302385	0.000294177	0.00026388	0.000189414	0.000239352	0.000340827	0.000307844	0.000235228	0.000152506	0.000264161
PE P-36:2	0.00015052	0.00027231	0.000177065	0.000105727	0.000198896	7.91911e-05	0.000154362	0.000229509	0.00020104	0.000172435	0.000134916	7.33913e-05	0.000143028	0.000246918	0.000210969	0.000138286	7.30946e-05	0.000174841
PE P-36:4	0.000319153	0.000197592	0.00040161	0.000578114	0.000288619	0.000465779	0.000444563	0.000254947	0.0004566	0.00032121	0.000469432	0.000560629	0.000359254	0.000223656	0.000340266	0.000457956	0.000460987	0.000299973
PE P-36:5	1.13767e-05	0	1.03208e-05	5.96432e-06	9.01967e-06	9.18195e-06	2.12165e-05	9.45307e-06	1.68453e-05	1.23142e-05	8.07089e-06	1.45734e-05	1.01549e-05	4.18814e-06	6.08046e-06	0	7.97902e-06	7.25486e-06
PE P-38:1	8.66365e-05	0.000142628	8.21411e-05	5.13077e-05	0.000122227	4.84439e-05	9.05333e-05	0.000133484	0.000101343	0.000126341	6.84639e-05	5.81475e-05	7.64107e-05	0.000135544	0.000108619	5.82403e-05	4.50813e-05	9.6769e-05
PE P-38:2	0.0003929	0.000858219	0.000476045	0.00033152	0.000585211	0.000236037	0.000353658	0.000687702	0.000546449	0.000523558	0.00043787	0.000243295	0.000349582	0.00080109	0.000642032	0.000429338	0.000222094	0.000514831
PE P-38:4_A	0.000164611	0.000166764	0.000122784	0.00022204	0.000189376	0.000168445	0.000250175	0.0001604	0.000192065	0.000204811	0.000248878	0.000224375	0.000149537	0.000149764	0.00012573	0.000223105	0.000140502	0.000177657
PE P-38:4_B	0.000631445	0.000460279	0.000626326	0.000723453	0.000494625	0.000766412	0.000704741	0.00042547	0.000664197	0.000503093	0.000704738	0.00085586	0.000682289	0.000457675	0.000626192	0.000796261	0.000776501	0.000535054
PE P-38:4_C	2.55992e-05	1.7899e-05	3.21919e-05	5.52615e-05	2.07331e-05	3.91685e-05	3.0995e-05	1.44701e-05	3.37596e-05	1.45647e-05	4.27031e-05	4.19714e-05	3.27e-05	1.96269e-05	3.2469e-05	5.03487e-05	4.10553e-05	2.41245e-05
PE P-38:6	0.00018867	7.67484e-05	0.000197605	0.000229231	0.000123776	0.000229405	0.000249913	0.000102758	0.000227481	0.000142503	0.000195129	0.000271558	0.000215265	9.25965e-05	0.00017028	0.000202967	0.000228316	0.000134102
PE P-40:4	3.90224e-05	2.54736e-05	3.53399e-05	4.43605e-05	2.49986e-05	4.77062e-05	4.1237e-05	2.29062e-05	3.4525e-05	2.39809e-05	3.95384e-05	5.0446e-05	4.3668e-05	2.99462e-05	4.32601e-05	4.91606e-05	5.26882e-05	2.84519e-05
PE P-40:7	0.000124748	9.03184e-05	0.000161697	0.000186734	0.000113724	0.000152333	0.000140843	8.68163e-05	0.000171107	0.000105892	0.000156383	0.000152633	0.000145231	0.000100083	0.000171477	0.000181729	0.00015829	0.00013025
PG 34:1_A	2.33399e-05	2.1009e-05	1.45881e-05	1.57832e-05	5.28905e-05	3.03322e-05	3.05543e-05	2.68956e-05	1.83675e-05	3.79455e-05	2.02295e-05	3.55008e-05	2.75321e-05	2.62747e-05	1.44691e-05	1.44204e-05	2.90091e-05	3.57223e-05
PG 34:1_B	0.000357051	0.000379743	0.000287827	0.000264257	0.000327271	0.000317904	0.000243918	0.00020887	0.000195408	0.000174692	0.000216166	0.000293452	0.000436657	0.000391633	0.000313968	0.000298519	0.00037784	0.000325769
PG 34:2_A	3.81994e-05	3.47691e-05	2.65769e-05	2.1286e-05	6.81256e-05	4.07576e-05	4.64507e-05	4.12012e-05	3.16053e-05	4.89158e-05	3.1149e-05	5.74419e-05	4.10391e-05	3.79961e-05	2.46399e-05	2.36152e-05	3.49181e-05	4.44807e-05
PG 34:2_B	1.37469e-05	2.41798e-05	2.03061e-05	1.4852e-05	1.97733e-05	1.09889e-05	1.44218e-05	1.84658e-05	1.75308e-05	1.19921e-05	1.58012e-05	1.7728e-05	1.56854e-05	2.36131e-05	1.81605e-05	1.34485e-05	1.33051e-05	1.54137e-05
PG 36:2_A	0.000164112	0.000263747	0.000128999	0.000148779	0.000375373	0.000198194	0.000178776	0.000264758	0.000154884	0.000272328	0.00019876	0.000207947	0.000168018	0.000277206	0.000149118	0.000173168	0.000187445	0.000311926
PG 36:2_B	3.09481e-05	4.29774e-05	2.98438e-05	2.65862e-05	3.38429e-05	2.33814e-05	2.35419e-05	2.85725e-05	2.56562e-05	1.8858e-05	2.90109e-05	2.21961e-05	3.50827e-05	4.48195e-05	3.25118e-05	3.06896e-05	2.63754e-05	3.52003e-05
PG 36:3	7.72227e-05	0.000136074	7.052e-05	6.59046e-05	0.000133063	6.72549e-05	7.32605e-05	0.000110299	6.83662e-05	8.97646e-05	7.85325e-05	6.96707e-05	8.0697e-05	0.000140513	8.47541e-05	8.04472e-05	6.16525e-05	0.000115515
PG 38:2	5.01928e-05	8.76816e-05	3.59254e-05	3.27667e-05	0.000160744	4.66142e-05	5.61006e-05	7.68808e-05	3.78112e-05	9.10473e-05	5.51483e-05	4.90421e-05	3.64294e-05	9.73693e-05	4.70288e-05	3.34173e-05	4.57967e-05	0.00012282
PG 38:3	0.000131135	0.000410046	0.000172043	0.000196872	0.000305627	0.00013153	0.000109972	0.000280084	0.000155741	0.000188117	0.000228825	0.000119752	0.000134309	0.00039607	0.000231852	0.000252223	0.000130677	0.000301685
PG 40:4	3.67274e-05	0.000218933	9.25173e-05	8.72868e-05	9.20251e-05	3.05075e-05	2.37397e-05	9.744e-05	5.92383e-05	4.19857e-05	9.99135e-05	2.40014e-05	3.70609e-05	0.00018361	0.000132397	0.000134409	3.28784e-05	0.000107868
PG 40:7	9.52429e-05	5.0577e-05	8.02702e-05	0.000169458	8.14108e-05	0.000141512	0.000102723	4.87606e-05	7.05639e-05	6.33538e-05	0.000160885	0.000133654	0.000118212	5.90437e-05	7.01033e-05	0.000161695	0.000136501	9.04858e-05
PG 40:8	1.92414e-05	9.25416e-06	1.41938e-05	3.36473e-05	1.04338e-05	1.96407e-05	1.68025e-05	5.36885e-06	1.00056e-05	4.71088e-06	2.86205e-05	1.5959e-05	2.2194e-05	1.05974e-05	1.35981e-05	3.31084e-05	1.65838e-05	9.87148e-06
PG 42:8	4.04761e-05	3.75209e-05	6.18818e-05	0.000133392	3.30452e-05	5.48242e-05	3.36153e-05	2.35579e-05	4.2458e-05	1.68783e-05	0.000110597	4.68335e-05	4.63566e-05	4.06795e-05	5.72529e-05	0.000135332	5.62958e-05	4.13443e-05
PG 44:12	2.15947e-05	0	1.93734e-05	7.77893e-05	4.64688e-06	3.76707e-05	2.55923e-05	0	1.26555e-05	0	5.08025e-05	3.72542e-05	3.52048e-05	0	1.18479e-05	5.43785e-05	4.17985e-05	6.81876e-06
PI 32:1	1.12993e-05	1.70931e-05	1.22849e-05	0	1.23823e-05	4.89869e-06	1.168e-05	1.1532e-05	1.29437e-05	0	0	2.1032e-05	1.37362e-05	1.44599e-05	1.38277e-05	0	7.69577e-06	3.90898e-06
PI 34:1	0.000237045	0.000271213	0.000225426	0.000149023	0.000218435	0.000200665	0.000205489	0.000208699	0.000201593	0.000105005	0.000147761	0.000330047	0.000279803	0.000256681	0.000251282	0.000158677	0.000245492	0.000167242
PI 34:2	3.75942e-05	5.80942e-05	4.29209e-05	7.33974e-06	4.96483e-05	1.88356e-05	3.11455e-05	4.35422e-05	3.85118e-05	1.4756e-05	1.45589e-05	5.26219e-05	4.20236e-05	5.57575e-05	5.06908e-05	1.2988e-05	2.61192e-05	2.42246e-05
PI 36:1	0.000259556	0.000351195	0.000281149	0.000159611	0.000346702	0.000188714	0.000229961	0.00028239	0.000251163	0.000166807	0.000188923	0.000325917	0.000285272	0.000308851	0.00031369	0.000207274	0.000209775	0.000261819
PI 36:2_A	0.000232147	0.000397888	0.00026157	0.000120001	0.000318291	0.000151861	0.000189383	0.000301019	0.000241137	0.000151064	0.000163316	0.000269353	0.000263354	0.000357337	0.000303898	0.000155892	0.0001763	0.000239682
PI 36:2_B	4.82085e-05	0.000160738	5.33121e-05	2.71022e-05	0.00010705	2.3963e-05	3.21155e-05	7.72284e-05	4.67737e-05	3.65919e-05	3.35561e-05	2.6542e-05	5.55376e-05	0.000131326	7.71886e-05	4.59609e-05	2.87399e-05	7.00532e-05
PI 36:4	0.000144792	0.000110979	0.000140193	9.09355e-05	0.000109102	0.0001552	0.00012713	9.44617e-05	0.000113816	5.3448e-05	8.13917e-05	0.000331249	0.000179803	0.000108877	0.000137139	9.60734e-05	0.000186499	8.68017e-05
PI 37:2	1.58725e-05	3.02119e-05	1.56468e-05	7.82714e-06	2.19486e-05	5.18229e-06	1.08113e-05	1.50329e-05	1.05734e-05	5.53577e-06	1.37868e-05	8.408e-06	1.72719e-05	2.90536e-05	2.04376e-05	1.44022e-05	8.28528e-06	1.8248e-05
PI 37:4	1.50247e-05	0	6.84115e-06	7.11209e-06	6.76699e-06	1.21989e-05	1.38646e-05	0	5.66973e-06	0	5.95507e-06	2.36698e-05	1.88824e-05	0	7.29612e-06	8.87532e-06	1.39994e-05	4.65549e-06
PI 38:2	0.000198633	0.000399531	0.000205652	0.000131562	0.000323573	0.000111635	0.000152043	0.000268067	0.000168727	0.000152026	0.000152248	0.000137872	0.000206034	0.000353703	0.00026059	0.000161251	0.000134623	0.000280261
PI 38:4_A	3.72487e-05	5.00013e-05	3.39655e-05	1.58014e-05	3.7219e-05	3.07612e-05	3.25839e-05	3.15418e-05	2.91307e-05	1.54253e-05	2.17082e-05	4.94704e-05	4.10184e-05	4.69217e-05	4.2624e-05	2.1145e-05	3.99355e-05	3.24559e-05
PI 38:4_B	0.000999928	0.00084016	0.000972841	0.00109838	0.000938317	0.00109569	0.0008067	0.00064075	0.000770708	0.000483792	0.000912366	0.00158331	0.00121945	0.000795065	0.000995724	0.00115639	0.00120928	0.000859981
PI 38:5	0.000118559	0.000138336	0.000123489	8.40693e-05	0.000134375	0.000109097	0.000109957	0.000115961	0.000125453	7.14775e-05	9.79216e-05	0.000214425	0.000140413	0.000124231	0.000134896	9.18595e-05	0.000124302	0.000109241
PI 40:4	6.21738e-05	4.28374e-05	5.62817e-05	6.18689e-05	6.09716e-05	8.18023e-05	5.04145e-05	3.04381e-05	4.16427e-05	3.35014e-05	5.6955e-05	9.29903e-05	7.47301e-05	4.34566e-05	5.94333e-05	7.10657e-05	9.17715e-05	6.58929e-05
PI 40:6	2.80442e-05	1.1765e-05	2.31902e-05	1.69451e-05	2.16079e-05	2.80834e-05	2.199e-05	1.10667e-05	1.64231e-05	1.20253e-05	1.40333e-05	3.53389e-05	3.1885e-05	1.31436e-05	2.43292e-05	1.7097e-05	3.0992e-05	2.06823e-05
PS 34:1	9.13052e-05	0.000106188	6.17967e-05	2.47244e-05	9.96343e-05	5.81807e-05	8.6546e-05	7.16416e-05	4.90465e-05	4.33128e-05	2.97329e-05	9.69991e-05	0.000113433	0.000102064	6.98965e-05	3.60913e-05	7.08099e-05	6.9079e-05
PS 36:1_A	0.000571332	0.00076177	0.000557306	0.000562045	0.000637714	0.000555312	0.000493265	0.000483089	0.000455833	0.000352553	0.000501137	0.000627012	0.000704685	0.000728049	0.000638485	0.00062682	0.000643545	0.000612075
PS 36:1_B	3.45713e-05	4.60898e-05	2.88086e-05	2.57838e-05	4.33771e-05	2.52256e-05	2.38763e-05	2.11232e-05	2.36609e-05	0	3.23424e-05	5.15446e-05	2.38386e-05	3.0196e-05	2.72773e-05	1.85695e-05	2.4376e-05	2.24965e-05
PS 36:2	0.000100834	0.000202961	0.000102131	6.6454e-05	0.000153744	8.10594e-05	8.33757e-05	9.57537e-05	7.24374e-05	6.67123e-05	7.5203e-05	9.53207e-05	0.000121984	0.000194747	0.000131665	8.95127e-05	9.22462e-05	0.000126644
PS 38:2	7.04408e-06	4.45637e-05	1.97835e-05	7.78084e-06	1.78456e-05	0	4.66797e-06	1.54841e-05	9.77205e-06	0	1.33087e-05	0	6.82126e-06	3.36308e-05	2.41119e-05	1.48397e-05	0	1.96811e-05
PS 40:4	6.35173e-05	3.72123e-05	5.01112e-05	6.90488e-05	3.79299e-05	8.58432e-05	5.6301e-05	2.63604e-05	4.05605e-05	2.09788e-05	6.45629e-05	9.29607e-05	7.24262e-05	4.05633e-05	4.99502e-05	7.34115e-05	0.000100988	4.69152e-05
PS 40:5	8.70189e-05	6.17656e-05	7.35432e-05	7.65912e-05	5.55847e-05	8.99323e-05	8.0566e-05	5.64481e-05	6.6471e-05	3.3202e-05	6.27841e-05	9.04803e-05	0.000105941	6.31611e-05	7.05221e-05	7.39548e-05	9.97387e-05	5.88655e-05
PS 40:6	0.00015244	8.48059e-05	0.00012315	0.000136938	7.89543e-05	0.00017391	0.000133795	7.12173e-05	9.96972e-05	5.19162e-05	0.000110859	0.000169313	0.000176969	9.25472e-05	0.000115986	0.000135481	0.000194208	8.75288e-05
